# Supplementary material for: Smooth and Flexible Dual Optimal Inequalities
Source: Atypon-hosted journal article supplement (doi:10.1287/ijoo.2021.0057), 2021-10-07
Supplement: ijoo.2021.0057.sm1.pdf [file ijoo.2021.0057.sm1.pdf]

# E-companion for manuscript entitled “Smooth and flexible dual optimal inequalities”

Naveed Haghani

Claudio Contardo

Julian Yarkony

March 4, 2021

## 1 Proofs

In this appendix we present the proofs of the different lemmas and propositions stated in the main manuscript.

*Proof of Proposition 1.* Let  $(\theta^*, \omega^*)$  be an optimal solution to problem (4)-(7). If multiple optima exist, let  $(\theta^*, \omega^*)$  be the one attaining the lowest possible value of  $\Sigma(\theta^*, \omega^*) = \sum\{\theta_l^* : l \in \Omega\} + \sum\{\omega_s^* : s \in \mathcal{S}\}$ . We will prove, by contradiction, that no variable  $\omega_s^*$  can take a strictly positive value. Let us assume that  $\omega_s^* > 0$  for a certain  $s \in \mathcal{S}$  and let us consider the following three scenarios:

- **There exists  $t \in \mathcal{S}$  such that  $\omega_t^* > 0, s^- = t^+, s^+ \neq t^-$ .**

Let  $r = (t^-, s^+)$ . Because of the triangle inequality,  $r$  lies in  $S$  and  $\rho_r \leq \rho_s + \rho_t$ . Let  $\Delta = \min\{\omega_s^*, \omega_t^*\}$ . We let  $\omega'_s \leftarrow \omega_s^* - \Delta$ ,  $\omega'_t \leftarrow \omega_t^* - \Delta$ ,  $\omega'_r \leftarrow \omega_r^* + \Delta$  and  $\omega'_k \leftarrow \omega_k^*$  for all  $k \in \mathcal{S} \setminus \{s, t, r\}$ . It is easy to see that  $(\theta^*, \omega')$  is primal feasible. The marginal contribution of replacing  $\omega^*$  by  $\omega'$  is  $\Delta(\rho_r - \rho_s - \rho_t)$ , which is non-positive. If negative (meaning that  $\Delta(\rho_r - \rho_s - \rho_t) < 0$ ) we obtain a contradiction with the optimality of  $(\theta^*, \omega^*)$ . If zero, on the other hand, the operation provides an alternate optimal solution  $(\theta^*, \omega')$  such that  $\Sigma(\theta^*, \omega') < \Sigma(\theta^*, \omega^*)$ , which is also a contradiction.

- **There exists  $t \in \mathcal{S}$  such that  $\omega_t^* > 0, s^- = t^+, s^+ = t^-$ .**

In this case we let  $\Delta = \min\{\omega_s^*, \omega_t^*\}$  and let  $\omega'_s \leftarrow \omega_s^* - \Delta$ ,  $\omega'_t \leftarrow \omega_t^* - \Delta$ , and  $\omega'_k \leftarrow \omega_k^*$  for all  $k \in \mathcal{S} \setminus \{s, t\}$ . It is easy to see that the solution  $(\theta^*, \omega')$  is also primal feasible and the marginal contribution of this operation is  $-\Delta(\rho_s + \rho_t)$ .

The term  $(\rho_s + \rho_t)$  is non-negative because of the following observation. From the definition of  $\Omega(\cdot)$  we have that  $l \in \Omega(s), l' = \text{swap}(l, s) \Leftrightarrow l' \in \Omega(t), l = \text{swap}(l', t)$ . Then, for any such pair  $(l, l')$  we have—from the conditions satisfied by  $\rho$ —that  $\rho_s + \rho_t \geq [c_{l'} - c_l] + [c_l - c_{l'}] \geq 0$ . If  $\rho_s + \rho_t > 0$ , this operation results in a contradiction with the optimality of  $(\theta^*, \omega^*)$ . If zero, on the other hand, the solution obtained is an alternate optimum and  $(\theta^*, \omega')$  is such that  $\Sigma(\theta^*, \omega') < \Sigma(\theta^*, \omega^*)$ , which is also a contradiction.

- **For every  $t \in \mathcal{S}$  such that  $s^- = t^+, \omega_t = 0$ .**

Since the primal problem is feasible and no  $t \in \mathcal{S}$  exists satisfying  $\omega_t^* > 0, s^- = t^+$ , there must exist a column  $l \in \Omega(s)$  such that  $\theta_l^* > 0$ . Let  $\Delta = \min\{\omega_s^*, \theta_l^*\}$  and let  $l' = \text{swap}(l, s)$ . We construct new variables  $\theta', \omega'$  with all components equal to those of  $(\theta^*, \omega^*)$  except for  $\omega'_s \leftarrow \omega_s^* - \Delta, \theta'_l \leftarrow \theta_l^* - \Delta, \theta'_{l'} \leftarrow \theta_{l'}^* + \Delta$ . This operation entails an increase in the objective of  $\Delta(c_{l'} - c_l - \rho_s)$  which by definition of  $\rho_s$  is non-positive. If negative, this would contradict the optimality of  $(\theta^*, \omega^*)$ . If zero, on the other hand, it would entail an alternate optimum such that  $\Sigma(\theta', \omega') < \Sigma(\theta^*, \omega^*)$  which is also a contradiction.

□

*Proof of Proposition 2.* Let  $(\theta^*, \xi^*)$  be an optimal solution to problem (8)-(12). If multiple such optima exist, let  $(\theta^*, \xi^*)$  be the one that minimizes  $\Sigma(\theta, \xi) = \sum\{\theta_l : l \in \Omega\} + \sum\{\xi_{u\sigma} : u \in N, \sigma \in \Lambda_u\}$ . We will prove by contradiction that if  $\xi_{u\sigma}^* > 0$  for some  $u \in N, \sigma \in \Lambda_u$  then either  $(\theta^*, \xi^*)$  cannot be optimum, or that an alternate optimum  $(\theta', \xi')$  exists such that  $\Sigma(\theta', \xi') < \Sigma(\theta^*, \xi^*)$ .

Let  $\xi_{u\sigma}^* > 0$  for some  $u \in N, \sigma \in \Lambda_u$ . Constraints (10) assure the existence of at least one column  $l \in \Omega$  such that  $\beta_{ul\sigma} = 1$  and  $\theta_l^* > 0$ . Let  $S = \{u \in N : a_{ul} = 1, \xi_{u\sigma_{ul}}^* > 0\}$  be the subset of items covered by  $l$  that are associated with a strictly positive value of  $\xi_{u\sigma_{ul}}^*$ . Let  $\Delta = \min\{\min_{u \in S} \xi_{u\sigma_{ul}}^*, \theta_l^*\}$ . Let  $l' = \text{remove}(l, S)$  be the column resulting from removing all items in  $S$  from  $l$ . Now, let us consider a solution  $(\theta', \xi')$  with all entries equal to those of  $(\theta^*, \xi^*)$  except for the entries  $\xi'_{u\sigma_{ul}} \leftarrow \xi_{u\sigma_{ul}}^* - \Delta$  for every  $u \in S, \theta'_l \leftarrow \theta_l^* - \Delta, \theta'_{l'} \leftarrow \theta_{l'}^* + \Delta$ . This operation entails a feasible solution with a marginal contribution to the objective equal to  $\Delta(c_{l'} - c_l + \sum_{u \in S} \sigma_{ul})$ . Either this quantity is negative—which would contradict the optimality of  $(\theta^*, \xi^*)$ —or  $\Sigma(\theta', \xi') < \Sigma(\theta^*, \xi^*)$  which is also not possible.

□

*Proof of Proposition 3.* Let  $(\theta^*, \omega^*, \xi^*)$  be an optimal solution to problem (13)-(18). If multiple optima exist, let it be one that minimizes  $\Sigma(\theta, \omega, \xi) = \sum_{l \in \Omega} \theta_l + \sum_{s \in \mathcal{S}} \omega_s +$

$\sum_{u \in N, \sigma \in \Lambda_u} \xi_{u\sigma}$ . The proof follows by applying the same arguments provided for the proofs of correctness for the S-DOI and F-DOI in sequence. First we assume that  $\omega_s^* > 0$  for some  $s \in \mathcal{S}$  to arrive to a contradiction. Then, assuming that  $\omega_s^* = 0$  for every  $s \in \mathcal{S}$ , we assume that  $\xi_{u\sigma}^* > 0$  for some  $u \in N, \sigma \in \Lambda_u$  to arrive to another contradiction.  $\square$

*Proof of Lemma 1.* Let  $\alpha^* \geq 0$  be such that  $c_l - \sum_{u \in N} a_{ul} \alpha_u^* \geq 0$  for every  $l \in \Omega$ , which implies that  $\alpha^*$  is feasible for the dual of (1)-(3), therefore  $\sum_{u \in N} \alpha_u^* \leq z^*$ . **Because  $(\alpha^*, \gamma^*)$  is feasible for the dual RMP of (13)-(18) when the constraint set is restricted to  $\Omega_R$ , it follows that  $\sum_{u \in N} \alpha_u^* \geq z^*$ .** Therefore  $\sum_{u \in N} \alpha_u^* \leq z^* \leq \sum_{u \in N} \alpha_u^*$ .  $\square$

*Proof of Proposition 4.* When one ignores the  $\gamma$  variables in the pricing process, two possible outcomes for the pricing are possible: i) We identify a column  $l \in \Omega$  such that  $c_l - \sum_{u \in N} a_{ul} \alpha_u^* < 0$ . Because the  $\gamma$ -variables are  $\leq 0$ , it follows that  $\bar{c}_l < 0$  when computed using equation (19). Therefore, the set  $\Omega_R$  can be enlarged by adding column  $l$ ; ii) For every column  $l \in \Omega$ ,  $c_l - \sum_{u \in N} a_{ul} \alpha_u^* \geq 0$ . In this case, we apply the result of Lemma 1 and stop the column generation. We have computed a valid dual bound for problem (1)-(3).  $\square$

*Proof of Proposition 5.* The first point is trivially true as swapping a customer  $u$  covered by a route by an uncovered customer  $v$  of lower demand is always possible. Let now  $s = (u, v)$  be such that  $u, v \in N, u \neq v, d_u \geq d_v$ . Let  $l \in \Omega(u, v)$  be a column containing  $u$  but not  $v$ . Let  $i, j$  be the predecessor and successor nodes of  $u$  in the route  $l$ . If nodes  $u, v$  were swapped and the ordering of the nodes not changed, the change in cost of this operation would be  $\Delta = c_{iv} + c_{vj} - c_{iu} - c_{uj}$ . This means that the cost  $c_{l'}$  of route  $l' = \text{swap}(l, s)$  is such that  $c_{l'} \leq c_l + \Delta \leq c_l + \rho_{uv}$ . It follows that  $c_{l'} - c_l \leq \rho_{uv}$  for every route  $l \in \Omega(u, v)$ .  $\square$

*Proof of Proposition 6.* Let  $l \in \Omega_R$ , and let  $S \subseteq N(l)$  be a subset of nodes covered by  $l$ . Let  $(s_1, \dots, s_n)$  be an arbitrary permutation of the elements of  $S$ , and let  $S_i = \{s_k : k = 1 \dots i\}$  be the subset of the first  $i$  elements in that permutation. Let  $l'_i = \text{remove}(l, S_i)$  and  $l'_0 = l$ . Note that  $c_l - c_{l'} = \sum_{i \in \{0, \dots, n-1\}} c_{l'_i} - c_{l'_{i+1}}$ . Note that by (31),  $\sigma_{s_i l} \leq c_{l'_{i-1}} - c_{l'_i}$ . Therefore  $\sum_{u \in S} \sigma_{ul} \leq c_l - c_{l'}$ .  $\square$

## 2 Computational performance and analysis on the CpMP and the CVRP

### 2.1 CpMP

In this appendix we present the computational study of our DOI on the CpMP described in Section 7.1. We test on the same datasets used in Section 8.2 where we set the facility count,  $p$ , for each problem to the facility count of the solution of the linear relaxation of the equivalent SSCFLP problem rounded up to the nearest integer. We also set each facility’s opening cost to zero. For the Holmberg et al. and Yang et al. datasets we run the same capacity adjustment experiments described in Section 8.2.3. The algorithms have been coded in Matlab and we use CPLEX as our general-purpose MIP solver. Our machine is equipped with an 8-core AMD Ryzen 1700 CPU @3.0 GHz and 32 GB of memory running Windows 10. We notice that on some CpMP problems, unstabilized CG can take prohibitively long to converge. For these problems, we set the maximum iteration count of CG to 5000 iterations. If by the 5000th iteration, the unstabilized CG has not yet converged, we exit. We use the time elapsed up to that point as the convergence time but add a “+” as an indicator that the true convergence time is longer. We also add a “+” when doing associated speedup calculations. All other implementation parameters are equivalent to those described in Section 8.2.

#### 2.1.1 Results on the Holmberg et al. and Yang et al. datasets

Numerical results for both datasets are shown in Table 1. On the Holmberg et al. dataset, we see that `sdoi` delivers the highest average and median speedup over all capacity levels, save for the average speedup at  $L = 3$ , where `sfdoi` provides the highest speedup. At higher capacity levels, `sfsdoi` generally provides the second highest speedup with average speedups of 12.7 and 14.9 at  $L = 3$  and  $L = 4$  respectively. On the Yang et al. dataset, `smsdoi` provides the fastest speedup at  $L = 1$  and  $L = 2$ . When  $L \geq 3$ , `sfsdoi` provides the fastest speedup, with a median speedup of 32.7 at  $L = 4$ . Across both datasets that `fdoi` do not generally perform well at lower capacity levels, however they perform significantly well at higher capacity levels.

#### 2.1.2 Results on newly generated random instances

CpMP results on the structured and unstructured synthetic datasets are shown in Tables 4 and 6 respectively. We see again that `sdoi` perform very well on the structured dataset

| Instance        |        |         | Time (sec) | Speedup |       |        |       |        |
|-----------------|--------|---------|------------|---------|-------|--------|-------|--------|
|                 |        |         | std        | sdoi    | fdoi  | sfdoi  | sm    | smsdoi |
| Holmberg et al. | mean   | $L = 1$ | 20.9       | 3.5     | 1.0   | 1.6    | 1.8   | 2.1    |
|                 |        | $L = 2$ | 48.6       | 6.9     | 3.1   | 5.4    | 2.9   | 5.0    |
|                 |        | $L = 3$ | 92.7       | 11.9    | 6.2   | 12.7   | 4.3   | 10.3   |
|                 |        | $L = 4$ | 121.0      | 14.9    | 8.1   | 14.9   | 5.8   | 10.9   |
|                 | median | $L = 1$ | 21.5       | 4.0     | 1.1   | 1.6    | 1.6   | 2.3    |
|                 |        | $L = 2$ | 32.6       | 6.4     | 2.7   | 3.9    | 2.5   | 4.0    |
|                 |        | $L = 3$ | 68.9       | 11.3    | 4.4   | 6.3    | 3.9   | 8.4    |
|                 |        | $L = 4$ | 98.5       | 12.5    | 5.3   | 10.7   | 5.8   | 8.2    |
| Yang et al.     | mean   | $L = 1$ | 38.0       | 1.5     | 0.2   | 0.3    | 1.7   | 1.1    |
|                 |        | $L = 2$ | 249.2      | 2.6     | 1.7   | 3.0    | 3.8   | 5.7    |
|                 |        | $L = 3$ | 1190.7     | 3.5     | 11.1  | 37.4   | 10.4  | 24.2   |
|                 |        | $L = 4$ | 3682.1+    | 5.5+    | 59.5+ | 103.6+ | 10.4+ | 57.6+  |
|                 | median | $L = 1$ | 32.7       | 1.6     | 0.2   | 0.3    | 1.6   | 0.9    |
|                 |        | $L = 2$ | 138.1      | 2.0     | 1.4   | 2.0    | 1.7   | 2.7    |
|                 |        | $L = 3$ | 523.5      | 3.3     | 3.4   | 7.3    | 4.2   | 7.1    |
|                 |        | $L = 4$ | 847.8      | 3.5     | 16.0  | 32.7   | 4.5   | 9.0    |

Table 1: CpMP runtime results for increased capacity. New capacity  $K'_i = LK_i$  for each facility

| std | sdoi | fdoi | sfdoi | sm | smsdoi |
|-----|------|------|-------|----|--------|
| 0   | 15   | 0    | 0     | 1  | 0      |

Table 2: CpMP # of instances with lowest runtime, Holmberg et al. dataset ( $|N| = 200$ )

| std | sdoi | fdoi | sfdoi | sm | smsdoi |
|-----|------|------|-------|----|--------|
| 0   | 3    | 0    | 0     | 6  | 1      |

Table 3: CpMP # of instances with lowest runtime, Yang et al. dataset ( $|N| = 200$ )

but still do not provide improvement on the unstructured dataset. In fact, only `fdoi` manage to provide a positive average speedup on the unstructured dataset. `sfdoi` has the highest average speedup on the structured dataset with a lower bound on the average speedup of 393.8. `sdoi` has the highest median speedup on the structured dataset with a median speedup of 132.5.

|        | Time (sec) | Speedup |       |        |       |        |
|--------|------------|---------|-------|--------|-------|--------|
|        | std        | sdoi    | fdoi  | sfdoi  | sm    | smsdoi |
| mean   | 8239.5+    | 329.2+  | 17.2+ | 393.8+ | 19.4+ | 291.8+ |
| median | 2212.3     | 132.5   | 5.9   | 69.5   | 10.1  | 78.8   |

Table 4: CpMP average runtime over 50 structured problem instances.

| std | sdoi | fdoi | sfdoi | sm | smsdoi |
|-----|------|------|-------|----|--------|
| 0   | 31   | 0    | 12    | 0  | 7      |

Table 5: CpMP # of instances with lowest runtime, 50 structured problem instances

|        | Time (sec) | Speedup |      |       |     |        |
|--------|------------|---------|------|-------|-----|--------|
|        | std        | sdoi    | fdoi | sfdoi | sm  | smsdoi |
| mean   | 52.7       | 0.7     | 1.2  | 0.8   | 3.0 | 1.0    |
| median | 50.3       | 0.7     | 1.3  | 0.8   | 3.0 | 1.0    |

Table 6: CpMP average runtime over 50 unstructured problem instances.

| std | sdoi | fdoi | sfdoi | sm | smsdoi |
|-----|------|------|-------|----|--------|
| 1   | 0    | 8    | 0     | 40 | 1      |

Table 7: CpMP # of instances with lowest runtime, 50 unstructured problem instances

## 2.2 CVRP

In this section, we assess the stabilization capabilities of the S-DOI, F-DOI and SF-DOI on the CVRP. To this end, our analysis considers instances from two datasets:

1. A subset of classical instances from the CVRP literature, namely from the sets E, M, P and X (Uchoa et al., 2017). We restrict our analysis to instances with 200 customers or less and such that the ratio between the number of customers and the number of vehicles is  $\geq 10$ . Note that the instances from the sets E, M and P assume that the number of available vehicles is limited, whereas for the instances from the set X the fleet us assumed to be of unlimited size.

2. A new dataset (denoted the H dataset) of 8 highly degenerate instances constructed as follows. The number of nodes  $|N|$  is picked in  $\{30, 40, 50, 60\}$ . The position of each node is picked at random inside a square of dimensions  $1000 \times 1000$ . The demands are integers picked at random in the interval  $[10, 100]$ . The minimum number of vehicles  $k$  is either 2 or 3. However, we follow the convention established by the instances of the set X and assume that the fleet is of unlimited size. If  $D$  represents the sum of the customers' demands, the vehicle capacity for a given  $k$  is equal to  $Q = \lfloor D/(k-1) \rfloor - 1$ . The capacity  $Q$  is made in such a way that  $k-1$  vehicles are short of one unit of capacity each to serve the entire demand.

Both datasets are made available in the website <http://claudio.contardo.org/datasets-source-code/>, including a Julia script to construct instances of the second dataset.

The CG algorithm has been coded in C++ and uses the IBM CPLEX 12.10 solver for the solution of the linear programs. Our CG considers several state-of-the-art acceleration techniques for the pricing subproblem, including two labeling heuristics and one metaheuristic (Contardo et al., 2020), bidirectional labeling (Righini and Salani, 2006), completion bounds (Baldacci et al., 2008; Contardo and Martinelli, 2014), and `ng-routes` embedded within a decremental state-space relaxation (DSSR) mechanism (Baldacci et al., 2011; Martinelli et al., 2014). We price on elementary routes only, but use DSSR to keep the computational burden under control. The MP is enhanced by the addition of rounded capacity cuts (Fukasawa et al., 2006). We initialize the RMP by executing a metaheuristic to construct near-optimal primal solutions. Every column from every such solution found by the metaheuristic is then used to initialize the RMP.

Differently from what we presented for the two previous problems, our implementation of the F-DOI considers fixed sets  $\Lambda_u^r = \Lambda^r = \{0, 5, 25, 125, 625, 3125\}$  of size six. Every time that a column enters the RMP, the value of  $\sigma_{ul}$  is computed and truncated down from the values in  $\Lambda_r$ . Our implementation of the S-DOI is also different from that used for the facility location problems. We consider a S-DOI for every possible tuple  $(u, v), u, v \in N, u \neq v, d_u \geq d_v$ .

### 2.2.1 Results for the first dataset

For the instances from the sets E, P, M and X we solve the linear relaxation of problem (27)-(29) with the addition of capacity cuts and report, in Tables 8, 9 and 10, the total elapsed CPU time (in seconds), the number of CG iterations, and the number of columns generated. We highlight in bold characters the setting that achieved the lowest value for each measure. Note that the results for instance M-n121-k7 are not reported as all six

settings had to be aborted after exceeding a time limit of one day. When looking at the CPU times, the results are not conclusive. The `std` setting is often the fastest, and the different stabilization schemes seem to provide little to no performance boost. We believe that this is mainly due to two factors:

- The fact that the pricing heuristics do not seem much affected by the choice of the stabilization, and regardless of the total number of CG iterations, the number of calls to the exact pricing routine remains almost constant throughout the different settings. An example of such behavior is instance M-n101-k10, where `sdoi` converges in about a 40% less CG iterations than `std`, but using a larger computing time.
- The little to no degeneracy of those instances. It is known that degeneracy in vehicle routing becomes a problem when excessively long routes are priced ( $\geq 25$  customers per route) (see, for instance Costa et al., 2019). None of the instances from this dataset satisfy this criterion, which is also why we generated the second dataset, with much longer routes.

The stabilization impact of the different settings, but in particular of `smsdoi` is better seen when one looks at the number of columns generated, which are several times less than those generated by the `std` setting.

### 2.2.2 Results for the second dataset

We have executed the same experiment for the second dataset, but now we have given the algorithm a maximum computing time of 86,400 seconds (one day), before the optimization is aborted and the problem considered as unsolved. In Tables 11-13 we report the same data as for the previous tables, and also highlight in bold characters the minimum for each row.

Now, we can see that the differences in CPU time between the `std` setting and the different stabilization schemes are important. The reductions in terms of number of iterations are of up to a factor of 10 (instance H-n60-k2). Although there is no one setting that outperforms the others, it can be seen that the dual optimal inequalities are very robust and provide substantial gains with respect to `std` or even `sm`. When put together, we see that `sdoi`, `fdoi` and `sfdoi` are best (in terms of CPU time) in all cases but one. However, we do not fully understand yet the problem characteristics that favors one stabilization scheme over another. This is an important subject that deserves further digging in a future research.

| Instance   | $ N $ | k  | std             | sm            | sdoi           | fdoi           | sfdoi         | smsdoi   |
|------------|-------|----|-----------------|---------------|----------------|----------------|---------------|----------|
| E-n76-k7   | 76    | 7  | <b>60.44</b>    | 121.69        | 68.93          | 81.10          | 81.02         | 83.18    |
| E-n101-k8  | 101   | 8  | <b>174.56</b>   | 218.78        | 193.09         | 318.32         | 319.44        | 227.03   |
| M-n101-k10 | 101   | 10 | <b>192.85</b>   | 245.49        | 209.57         | 243.06         | 270.26        | 311.56   |
| M-n151-k12 | 151   | 12 | 796.95          | 1170.36       | <b>759.06</b>  | 872.54         | 766.36        | 962.22   |
| M-n200-k16 | 200   | 16 | <b>3720.56</b>  | 3746.90       | 4543.44        | 5475.67        | 4148.73       | 5483.90  |
| M-n200-k17 | 200   | 17 | 2698.52         | 3776.41       | 2608.94        | <b>2574.36</b> | 4636.46       | 4297.49  |
| P-n76-k4   | 76    | 4  | 183.71          | 228.37        | 200.01         | 207.78         | <b>181.82</b> | 253.12   |
| P-n76-k5   | 76    | 5  | 120.94          | 149.21        | <b>105.23</b>  | 111.43         | 109.43        | 181.45   |
| P-n101-k4  | 101   | 4  | <b>1218.94</b>  | 1612.26       | 1258.48        | 2198.87        | 1829.53       | 1723.62  |
| X-n120-k6  | 120   | 6  | 1452.89         | 1008.98       | <b>957.24</b>  | 1923.64        | 1248.14       | 1091.00  |
| X-n139-k10 | 139   | 10 | <b>680.33</b>   | 833.67        | 695.39         | 980.30         | 771.51        | 936.19   |
| X-n143-k7  | 143   | 7  | <b>14446.83</b> | 23475.95      | 18949.61       | 16418.12       | 17412.14      | 21676.15 |
| X-n157-k13 | 157   | 13 | 710.17          | <b>636.54</b> | 693.26         | 1143.55        | 1041.41       | 822.42   |
| X-n162-k11 | 162   | 11 | 5694.35         | 5973.84       | <b>5515.11</b> | 7513.89        | 6593.95       | 5802.92  |
| X-n167-k10 | 167   | 10 | 3987.99         | 3756.02       | 4269.62        | <b>3645.37</b> | 3935.80       | 3856.73  |
| X-n186-k15 | 186   | 15 | 7359.41         | 8688.01       | <b>7102.83</b> | 7612.79        | 8416.60       | 8215.15  |
| X-n190-k8  | 190   | 8  | <b>19756.26</b> | 23594.75      | 21540.90       | 24211.85       | 24029.39      | 25009.03 |

Table 8: CPU time spent on some classic CVRP instances

| Instance   | $ N $ | k  | std         | sm         | sdoi       | fdoi       | sfdoi | smsdoi     |
|------------|-------|----|-------------|------------|------------|------------|-------|------------|
| E-n76-k7   | 76    | 7  | <b>97</b>   | 128        | 112        | 136        | 121   | 108        |
| E-n101-k8  | 101   | 8  | <b>149</b>  | 159        | 180        | 294        | 303   | 167        |
| M-n101-k10 | 101   | 10 | 766         | 711        | <b>415</b> | 463        | 488   | 463        |
| M-n151-k12 | 151   | 12 | <b>217</b>  | 275        | 228        | 250        | 251   | 241        |
| M-n200-k16 | 200   | 16 | 673         | 765        | 684        | <b>543</b> | 674   | 817        |
| M-n200-k17 | 200   | 17 | 226         | 236        | 225        | 252        | 287   | <b>166</b> |
| P-n76-k4   | 76    | 4  | 173         | 177        | 191        | 187        | 163   | <b>162</b> |
| P-n76-k5   | 76    | 5  | 125         | 101        | <b>87</b>  | 116        | 111   | 128        |
| P-n101-k4  | 101   | 4  | 512         | 712        | <b>423</b> | 684        | 459   | 751        |
| X-n120-k6  | 120   | 6  | 1841        | 1031       | 1137       | 1503       | 1386  | <b>865</b> |
| X-n139-k10 | 139   | 10 | 365         | 355        | <b>316</b> | 571        | 404   | 428        |
| X-n143-k7  | 143   | 7  | <b>816</b>  | 1219       | 855        | 1198       | 983   | 957        |
| X-n157-k13 | 157   | 13 | 653         | <b>515</b> | 688        | 857        | 753   | 567        |
| X-n162-k11 | 162   | 11 | 513         | 475        | <b>465</b> | 903        | 802   | 473        |
| X-n167-k10 | 167   | 10 | 634         | 611        | <b>582</b> | 822        | 745   | 650        |
| X-n186-k15 | 186   | 15 | <b>263</b>  | 394        | 239        | 368        | 411   | 336        |
| X-n190-k8  | 190   | 8  | <b>2341</b> | 2708       | 3312       | 3032       | 2922  | 2617       |

Table 9: CG iterations on some classic CVRP instances

| Instance   | $ N $ | k  | std   | sm          | sdoi  | fdoi        | sfdoi        | smsdoi       |
|------------|-------|----|-------|-------------|-------|-------------|--------------|--------------|
| E-n76-k7   | 76    | 7  | 2380  | <b>1139</b> | 2253  | 1841        | 1604         | 1147         |
| E-n101-k8  | 101   | 8  | 3649  | <b>2231</b> | 3801  | 3165        | 3225         | 2506         |
| M-n101-k10 | 101   | 10 | 6270  | 3510        | 2714  | <b>1926</b> | 2207         | 2056         |
| M-n151-k12 | 151   | 12 | 5268  | 3941        | 4859  | 3881        | 3611         | <b>2732</b>  |
| M-n200-k16 | 200   | 16 | 13975 | 10203       | 10398 | 14182       | 9094         | <b>5555</b>  |
| M-n200-k17 | 200   | 17 | 6711  | 4349        | 5506  | 5016        | 4643         | <b>2642</b>  |
| P-n76-k4   | 76    | 4  | 4786  | 3303        | 4327  | 4107        | 3410         | <b>2974</b>  |
| P-n76-k5   | 76    | 5  | 3277  | 1037        | 2652  | 2504        | 2544         | <b>924</b>   |
| P-n101-k4  | 101   | 4  | 18586 | 16352       | 14007 | 17217       | <b>9816</b>  | 18143        |
| X-n120-k6  | 120   | 6  | 14887 | 4686        | 5733  | 7081        | 5271         | <b>2650</b>  |
| X-n139-k10 | 139   | 10 | 7070  | 3192        | 5069  | 3950        | 3608         | <b>2284</b>  |
| X-n143-k7  | 143   | 7  | 22189 | 22604       | 23963 | 21315       | <b>17114</b> | 19506        |
| X-n157-k13 | 157   | 13 | 5122  | 2076        | 3840  | 3125        | 2498         | <b>1661</b>  |
| X-n162-k11 | 162   | 11 | 9789  | 5405        | 7897  | 7788        | 6563         | <b>4611</b>  |
| X-n167-k10 | 167   | 10 | 11022 | <b>6141</b> | 10134 | 9289        | 7594         | 6274         |
| X-n186-k15 | 186   | 15 | 6300  | 4220        | 5603  | 4276        | 4757         | <b>3319</b>  |
| X-n190-k8  | 190   | 8  | 42359 | 34043       | 47598 | 30314       | 31985        | <b>26999</b> |

Table 10: Total number of columns generated on some classic CVRP instances

| Instance | $ N $ | k | std           | sm      | sdoi          | fdoi           | sfdoi         | smsdoi  |
|----------|-------|---|---------------|---------|---------------|----------------|---------------|---------|
| H-n30-k2 | 30    | 2 | 116.81        | 124.44  | 122.50        | 96.96          | <b>46.38</b>  | 141.05  |
| H-n30-k3 | 30    | 3 | 48.64         | 94.66   | <b>31.18</b>  | 49.32          | 44.87         | 81.66   |
| H-n40-k2 | 40    | 2 | <b>341.42</b> | 653.93  | 429.62        | 418.93         | 616.23        | 620.67  |
| H-n40-k3 | 40    | 3 | 185.16        | 207.42  | 122.06        | 151.10         | <b>98.62</b>  | 382.00  |
| H-n50-k2 | 50    | 2 | 1610.59       | 1013.99 | 470.00        | 582.34         | <b>366.70</b> | 700.75  |
| H-n50-k3 | 50    | 3 | 2410.23       | 2140.66 | 2563.37       | <b>840.19</b>  | 896.54        | 1740.95 |
| H-n60-k2 | 60    | 2 | 40392.25      | –       | 90062.19      | <b>8308.26</b> | 20891.27      | –       |
| H-n60-k3 | 60    | 3 | 574.26        | 719.66  | <b>485.25</b> | 515.99         | 608.61        | 725.37  |

Table 11: CPU time spent on newly generated instances

| Instance | $ N $ | k | std  | sm  | sdoi | fdoi      | sfdoi      | smsdoi     |
|----------|-------|---|------|-----|------|-----------|------------|------------|
| H-n30-k2 | 30    | 2 | 64   | 171 | 75   | 57        | <b>25</b>  | 104        |
| H-n30-k3 | 30    | 3 | 140  | 129 | 85   | 112       | 98         | <b>78</b>  |
| H-n40-k2 | 40    | 2 | 112  | 383 | 227  | <b>48</b> | 105        | 269        |
| H-n40-k3 | 40    | 3 | 260  | 163 | 185  | 200       | <b>97</b>  | 263        |
| H-n50-k2 | 50    | 2 | 530  | 334 | 240  | 185       | <b>155</b> | 293        |
| H-n50-k3 | 50    | 3 | 1448 | 770 | 1369 | 396       | <b>267</b> | 694        |
| H-n60-k2 | 60    | 2 | 1865 | –   | 1250 | 199       | <b>184</b> | –          |
| H-n60-k3 | 60    | 3 | 446  | 459 | 416  | 353       | 404        | <b>286</b> |

Table 12: CG iterations on newly generated instances

| Instance | $ N $ | k | std   | sm    | sdoi  | fdoi        | sfdoi       | smsdoi      |
|----------|-------|---|-------|-------|-------|-------------|-------------|-------------|
| H-n30-k2 | 30    | 2 | 1944  | 4626  | 1667  | 748         | <b>379</b>  | 1266        |
| H-n30-k3 | 30    | 3 | 1412  | 619   | 875   | 455         | <b>336</b>  | 423         |
| H-n40-k2 | 40    | 2 | 4219  | 7797  | 4184  | <b>1391</b> | 2059        | 4004        |
| H-n40-k3 | 40    | 3 | 3287  | 1390  | 1905  | 1976        | <b>620</b>  | 1021        |
| H-n50-k2 | 50    | 2 | 12960 | 7298  | 4696  | 3827        | 3604        | <b>3274</b> |
| H-n50-k3 | 50    | 3 | 21990 | 9119  | 19976 | 5808        | <b>3489</b> | 6929        |
| H-n60-k2 | 60    | 2 | 27758 | –     | 19499 | 6104        | <b>3395</b> | –           |
| H-n60-k3 | 60    | 3 | 8082  | 10687 | 11284 | 7047        | 6547        | <b>4535</b> |

Table 13: Total number of columns generated on newly generated instances

### 3 Detailed results

In this Section we provide detailed results for the two location problems considered in our study, namely the single-source capacitated facility location problem (SSCFLP) and the capacitated  $p$ -median problem (CpMP).

| Inst. | lb      | Total Runtime (sec) |      |      |       |      | Iterations |     |      |      |       | Number of Columns |        |      |      |      |       |      |        |
|-------|---------|---------------------|------|------|-------|------|------------|-----|------|------|-------|-------------------|--------|------|------|------|-------|------|--------|
|       |         | std                 | sdoi | fdoi | sfdoi | sm   | smsdoi     | std | sdoi | fdoi | sfdoi | sm                | smsdoi | std  | sdoi | fdoi | sfdoi | sm   | smsdoi |
| 56    | 20972.1 | 5.1                 | 3.0  | 9.2  | 6.5   | 2.2  | 3.7        | 182 | 54   | 57   | 36    | 155               | 105    | 3707 | 1351 | 1257 | 970   | 1814 | 1001   |
| 57    | 25819.7 | 5.1                 | 3.7  | 16.7 | 15.5  | 1.8  | 3.9        | 169 | 64   | 75   | 53    | 119               | 99     | 3701 | 1458 | 1656 | 1187  | 1724 | 1043   |
| 58    | 36564.6 | 6.0                 | 4.8  | 36.2 | 29.9  | 1.7  | 4.6        | 175 | 67   | 106  | 64    | 113               | 103    | 3789 | 1673 | 2360 | 1500  | 1720 | 1110   |
| 59    | 26973.8 | 8.1                 | 6.1  | 31.5 | 21.4  | 5.1  | 10.5       | 210 | 103  | 112  | 62    | 303               | 260    | 4162 | 1847 | 2156 | 1374  | 2172 | 1316   |
| 60    | 20534.0 | 17.4                | 3.6  | 7.1  | 6.5   | 4.0  | 3.3        | 310 | 69   | 54   | 54    | 246               | 103    | 6022 | 1444 | 1033 | 763   | 1916 | 786    |
| 61    | 24454.0 | 27.9                | 4.9  | 12.2 | 6.2   | 7.5  | 6.4        | 398 | 84   | 81   | 42    | 315               | 186    | 7509 | 1830 | 1320 | 855   | 2437 | 1074   |
| 62    | 32287.6 | 15.5                | 6.1  | 31.4 | 30.2  | 3.5  | 5.2        | 267 | 83   | 105  | 63    | 173               | 121    | 5092 | 1691 | 2033 | 1344  | 2017 | 985    |
| 63    | 25084.1 | 36.2                | 6.4  | 15.0 | 8.5   | 6.1  | 5.1        | 462 | 118  | 87   | 61    | 308               | 151    | 7656 | 1716 | 1418 | 847   | 2171 | 892    |
| 64    | 20530.0 | 27.2                | 4.0  | 6.7  | 6.5   | 4.4  | 2.5        | 373 | 77   | 49   | 58    | 246               | 79     | 7356 | 1441 | 979  | 665   | 1993 | 684    |
| 65    | 24445.0 | 31.6                | 5.7  | 9.2  | 6.6   | 7.2  | 3.8        | 388 | 94   | 69   | 48    | 332               | 114    | 7715 | 1817 | 1051 | 712   | 2322 | 786    |
| 66    | 31264.2 | 26.7                | 6.8  | 22.6 | 25.9  | 3.3  | 4.9        | 330 | 91   | 95   | 71    | 158               | 110    | 6382 | 1651 | 1686 | 1192  | 2022 | 916    |
| 67    | 24803.1 | 38.4                | 41.4 | 16.4 | 10.8  | 10.4 | 11.7       | 489 | 428  | 85   | 62    | 586               | 269    | 7577 | 5951 | 1493 | 1093  | 2579 | 1680   |
| 68    | 20538.0 | 17.7                | 4.2  | 7.4  | 3.2   | 4.7  | 3.4        | 299 | 85   | 54   | 22    | 286               | 106    | 6065 | 1598 | 1076 | 629   | 2045 | 852    |
| 69    | 24532.0 | 28.1                | 5.3  | 10.8 | 9.2   | 8.8  | 5.3        | 383 | 91   | 64   | 69    | 365               | 156    | 7687 | 1855 | 1299 | 935   | 2431 | 1008   |
| 70    | 32230.1 | 34.7                | 8.9  | 49.8 | 21.8  | 6.3  | 6.9        | 427 | 139  | 154  | 86    | 291               | 171    | 7235 | 2109 | 2290 | 1206  | 2279 | 1002   |
| 71    | 25535.1 | 20.7                | 6.1  | 19.7 | 12.8  | 5.1  | 6.0        | 346 | 102  | 94   | 56    | 280               | 159    | 5958 | 1808 | 1691 | 1066  | 2087 | 929    |

Table 14: SSCFLP results, Holmberg et al. dataset ( $|N| = 200$ )

| Inst. | lb      | Total Runtime (sec) |      |       |       |        | Iterations |      |      |       |        | Number of Columns |      |       |       |      |        |      |      |
|-------|---------|---------------------|------|-------|-------|--------|------------|------|------|-------|--------|-------------------|------|-------|-------|------|--------|------|------|
|       |         | std                 | sdoi | fdoi  | sfdoi | smsdoi | std        | sdoi | fdoi | sfdoi | smsdoi | std               | sdoi | fdoi  | sfdoi | sm   | smsdoi |      |      |
| 1     | 29835.8 | 38.6                | 23.9 | 212.2 | 140.8 | 13.5   | 18.7       | 500  | 257  | 356   | 242    | 567               | 384  | 6759  | 3937  | 5669 | 3596   | 3150 | 2241 |
| 2     | 28582.5 | 28.4                | 22.1 | 202.7 | 141.2 | 8.9    | 13.9       | 363  | 250  | 307   | 211    | 402               | 275  | 6645  | 4129  | 5727 | 3730   | 3040 | 2144 |
| 3     | 27946.3 | 38.2                | 22.8 | 210.4 | 131.8 | 7.4    | 12.8       | 477  | 248  | 347   | 219    | 375               | 257  | 6818  | 3632  | 5582 | 3272   | 2691 | 1825 |
| 4     | 27670.5 | 54.0                | 35.7 | 274.2 | 143.1 | 13.1   | 16.6       | 595  | 379  | 383   | 222    | 513               | 348  | 8422  | 4672  | 6458 | 3558   | 3051 | 1942 |
| 5     | 27586.5 | 106.0               | 67.8 | 580.3 | 291.2 | 38.8   | 21.2       | 1070 | 698  | 854   | 589    | 977               | 439  | 10003 | 5796  | 7872 | 4631   | 3876 | 2067 |
| 6     | 27855.9 | 34.6                | 21.4 | 207.6 | 139.9 | 12.4   | 11.3       | 353  | 199  | 275   | 168    | 228               | 172  | 7812  | 4983  | 6645 | 4703   | 3800 | 3018 |
| 7     | 29450.4 | 27.4                | 19.5 | 175.4 | 134.4 | 12.1   | 10.2       | 290  | 186  | 247   | 152    | 224               | 156  | 7048  | 4760  | 6249 | 4426   | 3742 | 2943 |
| 8     | 27754.5 | 41.2                | 27.0 | 218.6 | 158.9 | 18.5   | 19.0       | 398  | 247  | 281   | 178    | 320               | 286  | 8661  | 5659  | 6797 | 4879   | 3938 | 3282 |
| 9     | 27476.1 | 28.9                | 19.6 | 184.5 | 137.3 | 10.5   | 8.5        | 307  | 179  | 260   | 149    | 239               | 133  | 7069  | 4483  | 6151 | 4071   | 3367 | 2435 |
| 10    | 28988.5 | 36.4                | 25.8 | 207.6 | 140.9 | 23.4   | 13.9       | 408  | 275  | 285   | 179    | 441               | 218  | 7514  | 5079  | 6568 | 4528   | 3954 | 3125 |

Table 15: SSCFLP results, Yang et al. dataset ( $|N| = 200$ )

| Inst. | lb   | Total Runtime (sec) |      |       |       |       | Iterations |      |      |      |       | Number of Columns |        |       |      |      |       |      |        |
|-------|------|---------------------|------|-------|-------|-------|------------|------|------|------|-------|-------------------|--------|-------|------|------|-------|------|--------|
|       |      | std                 | sdoi | fdoi  | sfdoi | sm    | smsdoi     | std  | sdoi | fdoi | sfdoi | sm                | smsdoi | std   | sdoi | fdoi | sfdoi | sm   | smsdoi |
| 1     | 68.4 | 910.0               | 27.7 | 190.2 | 60.2  | 42.7  | 12.0       | 1567 | 197  | 260  | 132   | 387               | 174    | 27726 | 3276 | 3768 | 1780  | 4297 | 1166   |
| 2     | 69.7 | 5121.3              | 14.2 | 293.5 | 42.6  | 68.8  | 8.6        | 3300 | 158  | 405  | 145   | 478               | 148    | 40777 | 1839 | 4341 | 1291  | 4450 | 930    |
| 3     | 68.6 | 7652.9              | 36.0 | 179.3 | 29.9  | 96.8  | 10.8       | 3799 | 237  | 276  | 79    | 642               | 184    | 56168 | 4110 | 3985 | 1325  | 5290 | 1150   |
| 4     | 70.1 | 523.4               | 18.6 | 457.1 | 56.2  | 61.3  | 11.8       | 1154 | 161  | 344  | 151   | 522               | 187    | 21236 | 2473 | 5474 | 1681  | 4538 | 1192   |
| 5     | 69.3 | 1069.5              | 24.7 | 129.5 | 37.6  | 65.4  | 9.7        | 1512 | 191  | 225  | 93    | 548               | 155    | 27828 | 3251 | 3593 | 1533  | 4797 | 1134   |
| 6     | 69.3 | 743.2               | 12.9 | 115.3 | 23.8  | 37.4  | 6.7        | 1492 | 127  | 217  | 77    | 343               | 103    | 25182 | 1978 | 3380 | 1098  | 3952 | 979    |
| 7     | 68.7 | 15400.0             | 12.3 | 292.1 | 18.4  | 72.7  | 5.0        | 4991 | 161  | 285  | 77    | 653               | 103    | 84034 | 1768 | 4103 | 917   | 5083 | 772    |
| 8     | 69.4 | 645.9               | 29.2 | 369.2 | 82.0  | 77.1  | 20.2       | 1196 | 201  | 310  | 139   | 710               | 320    | 22194 | 3532 | 4962 | 2129  | 4984 | 1546   |
| 9     | 70.0 | 689.1               | 27.3 | 161.0 | 53.2  | 48.3  | 9.6        | 1156 | 234  | 242  | 138   | 439               | 155    | 22351 | 3249 | 3820 | 1702  | 4231 | 1070   |
| 10    | 69.9 | 475.5               | 14.8 | 97.3  | 28.7  | 36.9  | 7.5        | 1008 | 157  | 196  | 88    | 311               | 110    | 18999 | 1993 | 2825 | 1124  | 3549 | 982    |
| 11    | 68.9 | 288.7               | 16.2 | 285.6 | 75.0  | 32.8  | 9.0        | 882  | 142  | 259  | 128   | 333               | 119    | 16261 | 2304 | 4167 | 1957  | 3928 | 1127   |
| 12    | 67.7 | 3606.8              | 48.9 | 248.8 | 59.8  | 113.8 | 18.1       | 2232 | 300  | 265  | 114   | 745               | 297    | 41675 | 4865 | 4591 | 1649  | 5456 | 1416   |
| 13    | 69.0 | 300.6               | 20.1 | 131.6 | 51.4  | 23.8  | 7.9        | 839  | 198  | 244  | 151   | 249               | 109    | 15534 | 2356 | 2957 | 1522  | 3475 | 971    |
| 14    | 71.2 | 408.9               | 27.8 | 161.2 | 65.8  | 33.8  | 10.3       | 1028 | 199  | 245  | 135   | 313               | 133    | 17878 | 2826 | 3414 | 1835  | 3692 | 1027   |
| 15    | 69.3 | 459.0               | 14.9 | 227.6 | 37.7  | 40.7  | 9.1        | 1130 | 142  | 275  | 88    | 339               | 140    | 19398 | 2087 | 3906 | 1393  | 3883 | 990    |
| 16    | 70.8 | 235.0               | 13.1 | 93.9  | 43.9  | 30.7  | 7.6        | 768  | 125  | 163  | 115   | 270               | 109    | 14251 | 1956 | 2767 | 1481  | 3645 | 1022   |
| 17    | 68.5 | 3424.2              | 58.6 | 407.5 | 55.5  | 88.6  | 15.3       | 2727 | 332  | 255  | 123   | 465               | 247    | 40871 | 5032 | 4492 | 1619  | 4436 | 1326   |
| 18    | 70.1 | 264.8               | 15.8 | 91.0  | 42.8  | 32.7  | 9.9        | 895  | 138  | 197  | 110   | 352               | 144    | 16751 | 2231 | 2913 | 1507  | 3821 | 1078   |
| 19    | 68.9 | 400.2               | 25.4 | 123.9 | 62.0  | 32.4  | 10.5       | 1054 | 176  | 177  | 125   | 326               | 148    | 18637 | 2939 | 3126 | 1753  | 3995 | 1223   |
| 20    | 69.7 | 550.8               | 23.8 | 156.7 | 40.6  | 46.8  | 12.9       | 1229 | 188  | 243  | 108   | 509               | 203    | 21560 | 3090 | 3509 | 1518  | 4251 | 1242   |
| 21    | 69.9 | 823.9               | 40.9 | 245.5 | 65.0  | 68.0  | 11.1       | 1798 | 312  | 301  | 157   | 542               | 164    | 25458 | 3821 | 4050 | 1896  | 4535 | 1174   |
| 22    | 71.5 | 142.9               | 17.6 | 82.4  | 43.6  | 18.3  | 9.2        | 644  | 139  | 150  | 91    | 238               | 120    | 12134 | 2377 | 2656 | 1598  | 3456 | 1201   |
| 23    | 68.7 | 423.4               | 14.0 | 64.4  | 19.6  | 49.8  | 6.9        | 1004 | 117  | 159  | 61    | 444               | 118    | 19178 | 2114 | 2584 | 907   | 4083 | 916    |
| 24    | 68.2 | 2602.4              | 12.4 | 114.5 | 30.3  | 78.6  | 11.1       | 2275 | 125  | 181  | 90    | 491               | 179    | 42203 | 2009 | 3139 | 1265  | 4566 | 1129   |
| 25    | 71.4 | 1637.5              | 13.8 | 82.9  | 23.9  | 67.1  | 7.6        | 1851 | 147  | 187  | 95    | 556               | 137    | 32344 | 1992 | 2771 | 1114  | 4720 | 941    |

Table 16: SSCFLP results structured problem instances 1-25.

| Inst. | lb   | Total Runtime (sec) |      |       |       |       | Iterations |      |      |      |       | Number of Columns |        |        |      |      |       |      |        |
|-------|------|---------------------|------|-------|-------|-------|------------|------|------|------|-------|-------------------|--------|--------|------|------|-------|------|--------|
|       |      | std                 | sdoi | fdoi  | sfdoi | sm    | smsdoi     | std  | sdoi | fdoi | sfdoi | sm                | smsdoi | std    | sdoi | fdoi | sfdoi | sm   | smsdoi |
| 26    | 68.7 | 7726.4              | 21.7 | 243.6 | 10.8  | 117.3 | 9.3        | 3581 | 183  | 313  | 44    | 1041              | 195    | 66893  | 3334 | 4240 | 666   | 6536 | 1000   |
| 27    | 69.3 | 8311.1              | 18.4 | 153.2 | 41.9  | 99.9  | 9.6        | 4193 | 183  | 285  | 131   | 711               | 169    | 61711  | 2375 | 3744 | 1440  | 5180 | 1047   |
| 28    | 70.2 | 128.5               | 14.8 | 76.0  | 46.7  | 15.3  | 8.6        | 613  | 138  | 160  | 106   | 215               | 110    | 11800  | 2040 | 2626 | 1564  | 3315 | 1143   |
| 29    | 67.7 | 3105.1              | 36.8 | 361.5 | 18.2  | 101.1 | 9.9        | 2597 | 268  | 268  | 67    | 815               | 188    | 38682  | 3777 | 4236 | 956   | 5495 | 1129   |
| 30    | 68.7 | 212.7               | 20.5 | 185.0 | 68.5  | 24.7  | 9.3        | 850  | 156  | 235  | 126   | 278               | 118    | 15055  | 2437 | 3876 | 1908  | 3615 | 1025   |
| 31    | 67.9 | 1016.3              | 19.6 | 276.7 | 28.0  | 58.8  | 11.0       | 1519 | 189  | 326  | 97    | 531               | 209    | 26770  | 2484 | 4669 | 1227  | 4471 | 1064   |
| 32    | 70.2 | 433.4               | 19.4 | 118.8 | 58.0  | 38.9  | 9.4        | 1094 | 196  | 235  | 162   | 340               | 140    | 20438  | 2338 | 3173 | 1605  | 3877 | 1035   |
| 33    | 69.1 | 2404.7              | 33.2 | 90.0  | 22.8  | 76.5  | 8.6        | 2149 | 227  | 184  | 77    | 431               | 146    | 36636  | 3537 | 3047 | 1074  | 4275 | 983    |
| 34    | 68.9 | 926.0               | 36.0 | 183.4 | 47.5  | 80.3  | 15.4       | 1403 | 232  | 190  | 117   | 636               | 284    | 26051  | 4301 | 3299 | 1434  | 5015 | 1298   |
| 35    | 68.9 | 5642.5              | 23.6 | 200.6 | 45.4  | 77.1  | 11.8       | 3726 | 266  | 374  | 155   | 547               | 199    | 50456  | 2528 | 3943 | 1370  | 4695 | 1085   |
| 36    | 68.0 | 260.1               | 18.9 | 109.8 | 52.5  | 23.1  | 8.7        | 1111 | 163  | 216  | 120   | 270               | 119    | 15586  | 2192 | 2915 | 1605  | 3505 | 912    |
| 37    | 69.0 | 370.4               | 17.7 | 204.3 | 56.9  | 31.9  | 8.7        | 1064 | 196  | 283  | 155   | 298               | 142    | 18989  | 2009 | 3797 | 1562  | 3756 | 989    |
| 38    | 68.4 | 779.3               | 33.0 | 341.9 | 58.0  | 75.4  | 11.7       | 1574 | 246  | 367  | 190   | 668               | 199    | 21781  | 3447 | 4740 | 1624  | 4818 | 1134   |
| 39    | 69.5 | 223.8               | 22.3 | 196.5 | 67.8  | 39.1  | 14.3       | 906  | 166  | 249  | 123   | 397               | 207    | 15189  | 2764 | 4027 | 1902  | 3957 | 1238   |
| 40    | 69.1 | 453.6               | 25.9 | 185.1 | 65.1  | 39.8  | 14.5       | 1289 | 211  | 296  | 156   | 348               | 224    | 20940  | 2889 | 4058 | 1896  | 4154 | 1104   |
| 41    | 67.9 | 318.9               | 22.0 | 183.7 | 72.6  | 30.6  | 8.7        | 1269 | 163  | 282  | 171   | 317               | 124    | 16084  | 2749 | 3817 | 1993  | 3623 | 1017   |
| 42    | 70.3 | 1065.8              | 26.9 | 217.8 | 20.0  | 59.9  | 8.6        | 1485 | 199  | 236  | 60    | 526               | 152    | 28862  | 3290 | 3566 | 974   | 4600 | 959    |
| 43    | 70.4 | 188.1               | 17.6 | 151.8 | 53.4  | 23.9  | 9.5        | 756  | 135  | 184  | 92    | 265               | 110    | 13902  | 2462 | 3367 | 1738  | 3610 | 1194   |
| 44    | 69.7 | 520.0               | 28.1 | 339.5 | 64.7  | 41.3  | 10.1       | 1178 | 194  | 291  | 119   | 361               | 142    | 21342  | 3154 | 4723 | 1980  | 3923 | 1125   |
| 45    | 70.0 | 156.2               | 16.5 | 85.2  | 56.1  | 27.7  | 12.5       | 678  | 131  | 149  | 95    | 288               | 169    | 13224  | 2412 | 2761 | 1737  | 3773 | 1293   |
| 46    | 67.7 | 53021.6             | 14.6 | 80.2  | 13.0  | 83.1  | 8.5        | 8137 | 143  | 179  | 46    | 548               | 170    | 155872 | 2577 | 2918 | 725   | 5260 | 975    |
| 47    | 69.8 | 215.0               | 23.5 | 267.9 | 80.4  | 32.3  | 10.9       | 710  | 160  | 215  | 117   | 259               | 158    | 13842  | 2773 | 3775 | 2069  | 3818 | 1191   |
| 48    | 69.3 | 373.0               | 12.1 | 74.3  | 25.8  | 36.7  | 7.1        | 1022 | 120  | 170  | 74    | 304               | 99     | 16443  | 1780 | 2444 | 1167  | 3776 | 1010   |
| 49    | 69.2 | 448.7               | 26.8 | 376.9 | 96.5  | 32.6  | 11.5       | 1453 | 220  | 368  | 173   | 323               | 135    | 18449  | 2865 | 4554 | 2225  | 3889 | 1358   |
| 50    | 68.4 | 400.3               | 16.9 | 154.4 | 51.1  | 45.9  | 10.5       | 923  | 163  | 233  | 135   | 383               | 154    | 17347  | 2209 | 3477 | 1609  | 4078 | 1094   |

Table 17: SSCFLP results structured problem instances 26-50.

| Inst. | lb   | Total Runtime (sec) |      |      |       |     | Iterations |     |      |      |       | Number of Columns |        |      |      |      |       |      |        |
|-------|------|---------------------|------|------|-------|-----|------------|-----|------|------|-------|-------------------|--------|------|------|------|-------|------|--------|
|       |      | std                 | sdoi | fdoi | sfdoi | sm  | smsdoi     | std | sdoi | fdoi | sfdoi | sm                | smsdoi | std  | sdoi | fdoi | sfdoi | sm   | smsdoi |
| 1     | 50.1 | 59.4                | 69.7 | 42.9 | 77.6  | 8.0 | 21.1       | 357 | 330  | 99   | 95    | 161               | 150    | 6952 | 6562 | 1836 | 1896  | 2611 | 2398   |
| 2     | 49.1 | 59.2                | 66.0 | 41.4 | 68.6  | 8.5 | 21.7       | 351 | 322  | 91   | 88    | 167               | 159    | 7093 | 6515 | 1886 | 1819  | 2655 | 2447   |
| 3     | 49.7 | 60.6                | 63.9 | 38.4 | 70.2  | 8.6 | 21.4       | 357 | 310  | 90   | 91    | 170               | 155    | 7188 | 6308 | 1825 | 1808  | 2594 | 2371   |
| 4     | 50.1 | 53.6                | 60.8 | 44.9 | 57.0  | 8.2 | 20.8       | 333 | 305  | 95   | 87    | 160               | 151    | 6754 | 6232 | 2013 | 1900  | 2506 | 2406   |
| 5     | 50.5 | 60.1                | 63.4 | 40.9 | 67.6  | 7.9 | 21.1       | 353 | 312  | 92   | 88    | 161               | 156    | 7204 | 6289 | 1926 | 1868  | 2530 | 2416   |
| 6     | 51.1 | 60.7                | 67.7 | 36.4 | 66.1  | 7.9 | 21.2       | 363 | 325  | 83   | 90    | 170               | 158    | 7339 | 6588 | 1794 | 1827  | 2526 | 2378   |
| 7     | 50.0 | 58.9                | 65.8 | 48.9 | 82.9  | 8.3 | 20.7       | 354 | 317  | 102  | 106   | 165               | 148    | 7036 | 6416 | 1988 | 2031  | 2600 | 2375   |
| 8     | 50.1 | 74.7                | 67.9 | 42.4 | 71.6  | 8.2 | 20.9       | 366 | 333  | 97   | 98    | 164               | 158    | 7283 | 6548 | 1904 | 1944  | 2484 | 2365   |
| 9     | 50.2 | 64.5                | 69.6 | 44.5 | 73.7  | 8.0 | 20.8       | 375 | 335  | 97   | 98    | 157               | 152    | 7436 | 6669 | 1897 | 1930  | 2505 | 2406   |
| 10    | 48.6 | 61.8                | 70.6 | 35.2 | 62.7  | 8.0 | 20.8       | 356 | 328  | 82   | 83    | 162               | 145    | 7193 | 6677 | 1733 | 1768  | 2473 | 2384   |
| 11    | 50.3 | 55.6                | 62.5 | 39.4 | 70.6  | 8.3 | 20.7       | 340 | 311  | 87   | 90    | 163               | 156    | 6891 | 6267 | 1881 | 1912  | 2593 | 2374   |
| 12    | 50.4 | 62.2                | 64.4 | 43.4 | 75.6  | 8.3 | 23.2       | 375 | 325  | 100  | 106   | 168               | 175    | 7301 | 6291 | 1872 | 1938  | 2505 | 2505   |
| 13    | 50.2 | 60.2                | 72.3 | 33.3 | 52.7  | 7.8 | 19.5       | 353 | 337  | 77   | 74    | 159               | 138    | 7194 | 6808 | 1608 | 1572  | 2471 | 2315   |
| 14    | 50.9 | 59.1                | 68.1 | 34.5 | 52.0  | 8.0 | 21.1       | 355 | 328  | 88   | 83    | 159               | 162    | 7058 | 6511 | 1648 | 1663  | 2555 | 2409   |
| 15    | 51.0 | 61.7                | 69.4 | 40.4 | 63.6  | 7.9 | 21.2       | 362 | 333  | 97   | 91    | 158               | 159    | 7235 | 6625 | 1785 | 1755  | 2418 | 2340   |
| 16    | 50.6 | 58.1                | 67.8 | 39.2 | 63.8  | 8.4 | 22.2       | 354 | 338  | 96   | 95    | 170               | 169    | 6958 | 6544 | 1762 | 1739  | 2505 | 2398   |
| 17    | 50.3 | 55.9                | 62.2 | 44.2 | 73.4  | 8.8 | 21.3       | 340 | 309  | 95   | 92    | 167               | 150    | 6915 | 6288 | 1994 | 1991  | 2727 | 2429   |
| 18    | 50.1 | 55.8                | 62.2 | 40.7 | 70.4  | 8.2 | 21.5       | 343 | 310  | 85   | 94    | 159               | 157    | 6845 | 6287 | 1886 | 1930  | 2565 | 2460   |
| 19    | 51.1 | 59.1                | 65.9 | 33.9 | 57.3  | 8.1 | 21.2       | 354 | 319  | 85   | 84    | 152               | 154    | 7019 | 6342 | 1647 | 1684  | 2514 | 2381   |
| 20    | 50.1 | 52.6                | 57.1 | 50.7 | 78.0  | 7.9 | 20.8       | 335 | 298  | 104  | 98    | 160               | 155    | 6676 | 5973 | 2091 | 2029  | 2503 | 2349   |
| 21    | 51.3 | 58.2                | 66.5 | 47.4 | 71.9  | 8.3 | 22.0       | 357 | 332  | 105  | 96    | 169               | 161    | 7068 | 6440 | 1931 | 1886  | 2572 | 2423   |
| 22    | 50.4 | 56.9                | 63.2 | 43.6 | 73.1  | 8.3 | 20.4       | 344 | 307  | 93   | 90    | 163               | 149    | 7053 | 6335 | 1953 | 1919  | 2577 | 2408   |
| 23    | 50.0 | 58.4                | 67.2 | 41.2 | 69.6  | 8.1 | 21.0       | 349 | 326  | 91   | 95    | 160               | 151    | 7042 | 6441 | 1835 | 1885  | 2456 | 2407   |
| 24    | 49.2 | 57.5                | 62.5 | 40.8 | 73.7  | 8.5 | 22.0       | 351 | 317  | 92   | 92    | 166               | 158    | 7048 | 6276 | 1857 | 1917  | 2619 | 2477   |
| 25    | 51.2 | 59.9                | 68.0 | 35.2 | 58.3  | 8.0 | 21.4       | 355 | 327  | 85   | 79    | 161               | 154    | 7130 | 6559 | 1714 | 1628  | 2496 | 2415   |

Table 18: SSCFLP results unstructured problem instances 1-25.

| Inst. | lb   | Total Runtime (sec) |      |      |       |     | Iterations |     |      |      |       | Number of Columns |        |      |      |      |       |      |        |
|-------|------|---------------------|------|------|-------|-----|------------|-----|------|------|-------|-------------------|--------|------|------|------|-------|------|--------|
|       |      | std                 | sdoi | fdoi | sfdoi | sm  | smsdoi     | std | sdoi | fdoi | sfdoi | sm                | smsdoi | std  | sdoi | fdoi | sfdoi | sm   | smsdoi |
| 26    | 49.9 | 60.4                | 67.3 | 40.7 | 68.5  | 7.8 | 21.0       | 358 | 322  | 89   | 89    | 156               | 151    | 7205 | 6567 | 1886 | 1858  | 2456 | 2427   |
| 27    | 50.5 | 56.4                | 62.0 | 52.2 | 89.8  | 8.0 | 22.1       | 344 | 308  | 107  | 108   | 166               | 158    | 6879 | 6205 | 2106 | 2143  | 2587 | 2462   |
| 28    | 49.7 | 59.9                | 69.5 | 42.8 | 71.2  | 8.0 | 21.2       | 354 | 326  | 92   | 91    | 158               | 151    | 7193 | 6616 | 1924 | 1935  | 2554 | 2441   |
| 29    | 50.2 | 60.3                | 68.2 | 47.3 | 71.5  | 8.3 | 19.9       | 365 | 330  | 101  | 96    | 154               | 147    | 7167 | 6573 | 1938 | 1933  | 2609 | 2341   |
| 30    | 50.0 | 60.5                | 64.7 | 35.5 | 55.5  | 7.9 | 20.7       | 356 | 318  | 83   | 76    | 160               | 151    | 7175 | 6412 | 1732 | 1639  | 2504 | 2423   |
| 31    | 50.8 | 62.5                | 69.7 | 31.7 | 46.6  | 7.9 | 20.5       | 366 | 330  | 81   | 76    | 165               | 159    | 7239 | 6586 | 1578 | 1528  | 2472 | 2308   |
| 32    | 50.6 | 61.4                | 66.5 | 36.2 | 61.6  | 7.9 | 20.2       | 358 | 322  | 82   | 82    | 160               | 150    | 7267 | 6517 | 1749 | 1740  | 2496 | 2352   |
| 33    | 49.6 | 58.1                | 66.5 | 43.3 | 69.2  | 7.6 | 21.0       | 353 | 321  | 96   | 90    | 160               | 158    | 7101 | 6554 | 1884 | 1869  | 2459 | 2416   |
| 34    | 50.4 | 52.8                | 64.4 | 48.2 | 78.7  | 7.7 | 21.1       | 334 | 323  | 100  | 101   | 153               | 156    | 6738 | 6399 | 1988 | 1963  | 2448 | 2371   |
| 35    | 51.1 | 54.2                | 59.6 | 42.5 | 73.9  | 7.7 | 21.1       | 338 | 302  | 92   | 93    | 158               | 156    | 6868 | 6181 | 1974 | 1943  | 2560 | 2427   |
| 36    | 51.6 | 60.5                | 63.3 | 36.4 | 61.7  | 8.3 | 21.8       | 356 | 311  | 85   | 80    | 162               | 155    | 7254 | 6315 | 1774 | 1742  | 2548 | 2392   |
| 37    | 49.8 | 58.1                | 63.8 | 38.9 | 55.3  | 8.0 | 20.5       | 352 | 312  | 89   | 87    | 157               | 150    | 7123 | 6329 | 1775 | 1799  | 2541 | 2389   |
| 38    | 50.8 | 57.5                | 66.3 | 52.2 | 93.3  | 8.4 | 21.7       | 358 | 328  | 107  | 115   | 172               | 161    | 6942 | 6536 | 2124 | 2154  | 2736 | 2441   |
| 39    | 50.8 | 58.0                | 64.6 | 44.9 | 64.3  | 8.1 | 21.3       | 359 | 321  | 99   | 97    | 168               | 155    | 7119 | 6370 | 1968 | 1989  | 2573 | 2413   |
| 40    | 51.1 | 61.3                | 66.3 | 39.1 | 69.3  | 8.0 | 20.8       | 363 | 321  | 91   | 94    | 162               | 155    | 7222 | 6405 | 1808 | 1818  | 2454 | 2342   |
| 41    | 50.3 | 59.7                | 63.7 | 32.1 | 56.6  | 8.2 | 21.1       | 351 | 308  | 73   | 75    | 166               | 156    | 7157 | 6286 | 1609 | 1634  | 2572 | 2404   |
| 42    | 50.6 | 56.8                | 62.0 | 35.1 | 61.2  | 8.2 | 21.4       | 344 | 305  | 82   | 81    | 169               | 161    | 6935 | 6174 | 1710 | 1718  | 2542 | 2396   |
| 43    | 51.1 | 57.1                | 63.8 | 38.1 | 62.9  | 8.1 | 20.7       | 343 | 312  | 88   | 83    | 166               | 159    | 7040 | 6393 | 1826 | 1794  | 2561 | 2368   |
| 44    | 50.9 | 58.9                | 67.9 | 39.1 | 66.7  | 8.7 | 21.7       | 351 | 330  | 92   | 90    | 169               | 156    | 7076 | 6512 | 1720 | 1806  | 2721 | 2428   |
| 45    | 50.5 | 58.7                | 62.1 | 46.0 | 77.9  | 8.2 | 21.8       | 353 | 313  | 96   | 98    | 165               | 162    | 7068 | 6247 | 1975 | 1992  | 2599 | 2441   |
| 46    | 50.2 | 60.0                | 64.6 | 32.3 | 49.8  | 8.1 | 21.1       | 355 | 315  | 80   | 82    | 170               | 162    | 7125 | 6332 | 1615 | 1638  | 2509 | 2383   |
| 47    | 49.9 | 59.6                | 64.8 | 48.6 | 68.6  | 8.0 | 21.3       | 366 | 321  | 109  | 105   | 160               | 157    | 7099 | 6359 | 1946 | 1963  | 2541 | 2426   |
| 48    | 51.0 | 59.1                | 64.5 | 35.9 | 65.3  | 8.3 | 22.2       | 352 | 313  | 83   | 89    | 170               | 160    | 7017 | 6260 | 1724 | 1773  | 2579 | 2452   |
| 49    | 50.9 | 56.9                | 63.6 | 42.7 | 56.9  | 8.1 | 21.8       | 349 | 317  | 95   | 94    | 165               | 162    | 7011 | 6287 | 1965 | 1928  | 2535 | 2402   |
| 50    | 50.4 | 58.6                | 66.3 | 38.1 | 60.5  | 7.6 | 20.4       | 354 | 319  | 90   | 84    | 157               | 152    | 7065 | 6442 | 1797 | 1723  | 2447 | 2324   |

Table 19: SSCFLP results unstructured problem instances 26-50.

| Inst. | lb      | Total Runtime (sec) |      |      |       |        | Iterations |      |      |       |    | Number of Columns |     |      |      |       |      |        |      |
|-------|---------|---------------------|------|------|-------|--------|------------|------|------|-------|----|-------------------|-----|------|------|-------|------|--------|------|
|       |         | std                 | sdoi | fdoi | sfdoi | smsdoi | std        | sdoi | fdoi | sfdoi | sm | smsdoi            | std | sdoi | fdoi | sfdoi | sm   | smsdoi |      |
| 56    | 11992.6 | 4.6                 | 3.7  | 16.5 | 10.2  | 4.3    | 6.1        | 171  | 57   | 68    | 49 | 227               | 146 | 3535 | 1358 | 1460  | 1030 | 1912   | 1062 |
| 57    | 13067.8 | 7.0                 | 3.7  | 56.4 | 23.2  | 5.0    | 7.1        | 187  | 57   | 124   | 47 | 239               | 154 | 3966 | 1457 | 2582  | 1188 | 2208   | 1191 |
| 58    | 13067.8 | 6.9                 | 3.8  | 52.3 | 21.1  | 4.6    | 7.1        | 187  | 57   | 124   | 47 | 239               | 154 | 3966 | 1457 | 2582  | 1188 | 2208   | 1191 |
| 59    | 13067.8 | 6.9                 | 3.7  | 50.7 | 20.8  | 4.8    | 7.0        | 187  | 57   | 124   | 47 | 239               | 154 | 3966 | 1457 | 2582  | 1188 | 2208   | 1191 |
| 60    | 13034.0 | 15.8                | 3.8  | 13.2 | 10.7  | 8.4    | 7.4        | 278  | 72   | 87    | 76 | 430               | 200 | 5533 | 1465 | 1171  | 935  | 2286   | 1008 |
| 61    | 14854.0 | 27.5                | 7.0  | 25.0 | 13.3  | 16.8   | 11.1       | 369  | 115  | 97    | 66 | 577               | 276 | 7096 | 2169 | 1736  | 1113 | 3069   | 1295 |
| 62    | 15943.2 | 20.8                | 5.2  | 48.1 | 22.9  | 11.1   | 9.7        | 304  | 80   | 125   | 64 | 456               | 211 | 5679 | 1566 | 2225  | 1194 | 2777   | 1189 |
| 63    | 14854.0 | 27.5                | 7.0  | 25.1 | 13.4  | 16.9   | 11.2       | 369  | 115  | 97    | 66 | 577               | 276 | 7096 | 2169 | 1736  | 1113 | 3069   | 1295 |
| 64    | 13030.0 | 21.3                | 3.8  | 9.2  | 8.9   | 8.8    | 5.8        | 321  | 70   | 58    | 62 | 486               | 154 | 6385 | 1450 | 1006  | 809  | 2289   | 803  |
| 65    | 14845.0 | 32.2                | 5.6  | 13.2 | 8.5   | 17.6   | 10.5       | 375  | 90   | 69    | 40 | 723               | 275 | 7527 | 1797 | 1254  | 771  | 3107   | 1265 |
| 66    | 17930.7 | 28.3                | 7.0  | 29.2 | 25.2  | 8.8    | 11.1       | 369  | 103  | 108   | 84 | 417               | 246 | 6312 | 1677 | 1736  | 1168 | 2486   | 1162 |
| 67    | 14619.0 | 29.4                | 27.7 | 29.3 | 24.0  | 18.6   | 19.8       | 372  | 238  | 99    | 83 | 633               | 397 | 7169 | 4770 | 1846  | 1355 | 3197   | 2166 |
| 68    | 13038.0 | 15.0                | 4.5  | 12.7 | 7.7   | 10.6   | 6.3        | 272  | 86   | 73    | 46 | 534               | 171 | 5293 | 1630 | 1241  | 803  | 2613   | 990  |
| 69    | 14932.0 | 27.3                | 6.0  | 21.5 | 13.6  | 13.7   | 11.1       | 338  | 97   | 83    | 80 | 523               | 273 | 6883 | 1990 | 1579  | 1030 | 2714   | 1317 |
| 70    | 17258.5 | 42.7                | 9.6  | 56.6 | 25.9  | 20.6   | 18.5       | 481  | 150  | 148   | 73 | 672               | 397 | 7636 | 2049 | 2526  | 1239 | 3309   | 1504 |
| 71    | 14167.0 | 21.6                | 4.7  | 13.3 | 7.1   | 15.6   | 9.3        | 319  | 81   | 66    | 39 | 700               | 246 | 6373 | 1732 | 1336  | 821  | 3003   | 1313 |

Table 20: CpMP results, Holmberg et al. dataset ( $|N| = 200$ )

| Inst. | lb     | Total Runtime (sec) |      |       |       |        | Iterations |      |      |       |        | Number of Columns |      |      |       |      |        |      |      |
|-------|--------|---------------------|------|-------|-------|--------|------------|------|------|-------|--------|-------------------|------|------|-------|------|--------|------|------|
|       |        | std                 | sdoi | fdoi  | sfdoi | smsdoi | std        | sdoi | fdoi | sfdoi | smsdoi | std               | sdoi | fdoi | sfdoi | sm   | smsdoi |      |      |
| 1     | 5963.4 | 35.5                | 21.3 | 201.1 | 159.1 | 21.0   | 37.2       | 392  | 208  | 273   | 187    | 685               | 652  | 6828 | 3802  | 4918 | 3298   | 3544 | 3328 |
| 2     | 5361.6 | 22.5                | 17.0 | 119.9 | 107.5 | 11.0   | 14.6       | 276  | 161  | 185   | 118    | 499               | 282  | 5743 | 3523  | 4013 | 2877   | 3062 | 2285 |
| 3     | 5097.4 | 43.9                | 24.7 | 172.9 | 153.4 | 12.5   | 25.7       | 496  | 250  | 288   | 199    | 541               | 478  | 6680 | 3550  | 4230 | 2879   | 3081 | 2484 |
| 4     | 5582.7 | 32.7                | 21.1 | 141.3 | 101.1 | 10.3   | 34.9       | 374  | 188  | 239   | 143    | 414               | 624  | 6577 | 3481  | 4357 | 2669   | 3106 | 3130 |
| 5     | 6810.6 | 90.8                | 69.1 | 462.2 | 298.5 | 71.8   | 58.9       | 720  | 531  | 551   | 352    | 1260              | 959  | 9595 | 6188  | 7286 | 4121   | 5285 | 3758 |
| 6     | 5039.4 | 32.7                | 20.4 | 128.5 | 106.7 | 19.6   | 40.8       | 306  | 178  | 182   | 139    | 372               | 559  | 7164 | 4871  | 4723 | 3831   | 4069 | 4340 |
| 7     | 5335.3 | 29.8                | 21.1 | 203.1 | 174.2 | 68.9   | 51.5       | 274  | 184  | 223   | 142    | 884               | 626  | 6786 | 4701  | 5856 | 4236   | 6080 | 4277 |
| 8     | 4855.4 | 34.8                | 21.7 | 168.3 | 119.5 | 33.1   | 54.9       | 312  | 185  | 196   | 133    | 542               | 698  | 7576 | 5029  | 5445 | 4055   | 4461 | 4615 |
| 9     | 4709.2 | 28.0                | 19.3 | 93.2  | 79.8  | 19.0   | 27.0       | 313  | 206  | 151   | 117    | 394               | 395  | 6509 | 4289  | 4040 | 3327   | 3847 | 3437 |
| 10    | 4507.2 | 29.7                | 18.2 | 182.5 | 128.1 | 32.0   | 37.3       | 285  | 172  | 186   | 122    | 492               | 522  | 6798 | 4543  | 5278 | 4091   | 4601 | 4027 |

Table 21: CpMP results, Yang et al. dataset ( $|N| = 200$ )

| Inst. | lb   | Total Runtime (sec) |      |        |       |        | Iterations |      |      |      |       | Number of Columns |        |        |      |       |       |       |        |
|-------|------|---------------------|------|--------|-------|--------|------------|------|------|------|-------|-------------------|--------|--------|------|-------|-------|-------|--------|
|       |      | std                 | sdoi | fdoi   | sfdoi | sm     | smsdoi     | std  | sdoi | fdoi | sfdoi | sm                | smsdoi | std    | sdoi | fdoi  | sfdoi | sm    | smsdoi |
| 1     | 39.5 | 1084.6              | 14.8 | 192.1  | 38.0  | 87.4   | 24.8       | 1054 | 122  | 243  | 84    | 928               | 391    | 20285  | 2203 | 3763  | 1428  | 4790  | 1766   |
| 2     | 39.7 | 29907.3             | 48.2 | 884.5  | 26.2  | 3033.4 | 38.9       | 5000 | 274  | 439  | 75    | 7973              | 672    | 98239  | 5294 | 5005  | 1024  | 27699 | 2327   |
| 3     | 39.5 | 1503.4              | 15.2 | 262.0  | 28.1  | 217.6  | 20.8       | 1531 | 138  | 427  | 90    | 1674              | 375    | 27249  | 2086 | 3766  | 1070  | 7641  | 1516   |
| 4     | 40.3 | 9427.9              | 22.8 | 1044.4 | 29.0  | 462.6  | 35.8       | 3075 | 181  | 365  | 73    | 2486              | 556    | 56292  | 2985 | 4906  | 1136  | 10570 | 2018   |
| 5     | 40.1 | 758.6               | 11.2 | 120.6  | 35.9  | 91.0   | 22.0       | 1140 | 99   | 173  | 71    | 1073              | 320    | 21992  | 1840 | 3044  | 1288  | 5507  | 1758   |
| 6     | 39.4 | 6817.7              | 15.2 | 402.4  | 25.2  | 1089.5 | 19.7       | 2684 | 132  | 346  | 81    | 4745              | 379    | 48680  | 2251 | 4190  | 1090  | 18120 | 1541   |
| 7     | 38.7 | 29941.4             | 30.0 | 663.7  | 23.5  | 1103.2 | 20.7       | 5000 | 213  | 384  | 82    | 5369              | 398    | 99416  | 3843 | 4310  | 886   | 20488 | 1757   |
| 8     | 40.1 | 19280.1             | 43.7 | 321.0  | 18.0  | 294.0  | 26.1       | 4397 | 245  | 197  | 47    | 2123              | 497    | 87164  | 4768 | 3225  | 935   | 9657  | 2228   |
| 9     | 40.1 | 28076.5             | 36.5 | 532.6  | 27.2  | 1423.4 | 41.1       | 5000 | 230  | 282  | 74    | 4471              | 637    | 97296  | 4067 | 4124  | 1196  | 17687 | 2361   |
| 10    | 40.8 | 406.9               | 10.8 | 69.3   | 32.0  | 118.6  | 26.6       | 927  | 103  | 153  | 85    | 1114              | 390    | 18005  | 1593 | 2365  | 1121  | 5266  | 1511   |
| 11    | 39.4 | 597.7               | 36.7 | 324.9  | 48.9  | 168.4  | 28.6       | 998  | 209  | 230  | 85    | 1478              | 433    | 19590  | 3982 | 3744  | 1540  | 7100  | 2121   |
| 12    | 42.7 | 32913.9             | 47.0 | 6929.0 | 96.2  | 9905.1 | 40.7       | 5000 | 269  | 684  | 116   | 12700             | 516    | 89163  | 4373 | 12127 | 1745  | 39769 | 2427   |
| 13    | 44.1 | 394.1               | 18.1 | 243.3  | 56.1  | 41.2   | 16.2       | 800  | 163  | 315  | 123   | 488               | 216    | 15131  | 2146 | 3957  | 1532  | 3957  | 1324   |
| 14    | 46.2 | 514.3               | 23.5 | 253.1  | 82.8  | 224.1  | 42.8       | 989  | 201  | 293  | 151   | 1194              | 510    | 17603  | 2366 | 4220  | 1776  | 6593  | 1985   |
| 15    | 39.9 | 4199.1              | 27.9 | 485.3  | 27.3  | 187.5  | 26.1       | 2242 | 182  | 267  | 72    | 1614              | 456    | 44380  | 3521 | 3887  | 938   | 7708  | 2026   |
| 16    | 40.9 | 1062.1              | 22.7 | 460.8  | 66.5  | 430.8  | 38.9       | 1313 | 158  | 261  | 123   | 2223              | 474    | 22422  | 2653 | 3653  | 1795  | 9088  | 2109   |
| 17    | 39.6 | 859.7               | 14.2 | 88.6   | 44.0  | 103.2  | 41.8       | 1208 | 111  | 154  | 85    | 997               | 529    | 20664  | 2072 | 2608  | 1433  | 4895  | 2034   |
| 18    | 40.6 | 552.0               | 16.5 | 115.9  | 43.4  | 132.8  | 31.9       | 1017 | 182  | 247  | 127   | 1265              | 478    | 19494  | 2020 | 2762  | 1220  | 5950  | 1663   |
| 19    | 39.7 | 709.1               | 27.5 | 265.2  | 54.1  | 145.9  | 34.4       | 981  | 152  | 184  | 91    | 1209              | 520    | 18968  | 3013 | 3268  | 1565  | 6278  | 1970   |
| 20    | 39.8 | 7095.6              | 18.9 | 408.0  | 17.2  | 1507.3 | 21.3       | 2835 | 136  | 264  | 47    | 6593              | 326    | 51016  | 2733 | 3862  | 903   | 20584 | 1618   |
| 21    | 40.2 | 2379.4              | 14.9 | 613.2  | 36.0  | 150.4  | 23.8       | 2108 | 137  | 582  | 90    | 1535              | 343    | 30843  | 2291 | 5705  | 1339  | 6332  | 1524   |
| 22    | 41.7 | 561.1               | 27.2 | 202.4  | 61.5  | 103.8  | 28.1       | 964  | 172  | 254  | 122   | 1061              | 403    | 18281  | 3193 | 3787  | 1748  | 5780  | 1885   |
| 23    | 38.9 | 6829.2              | 11.6 | 187.8  | 22.7  | 345.3  | 18.3       | 2712 | 124  | 341  | 81    | 1838              | 290    | 44449  | 1722 | 3292  | 893   | 8324  | 1231   |
| 24    | 38.7 | 23792.9             | 31.7 | 993.4  | 14.5  | 830.8  | 45.8       | 5000 | 191  | 487  | 49    | 3912              | 699    | 100046 | 3797 | 5972  | 813   | 16259 | 2446   |
| 25    | 41.4 | 28618.2             | 29.5 | 758.9  | 21.3  | 353.4  | 21.2       | 5000 | 203  | 363  | 84    | 2258              | 345    | 97538  | 3500 | 4347  | 960   | 9996  | 1376   |

Table 22: CpMP results structured problem instances 1-25.

| Inst. | lb   | Total Runtime (sec) |      |       |       |       | Iterations |      |      |      |       | Number of Columns |        |        |      |      |       |       |        |
|-------|------|---------------------|------|-------|-------|-------|------------|------|------|------|-------|-------------------|--------|--------|------|------|-------|-------|--------|
|       |      | std                 | sdoi | fdoi  | sfdoi | sm    | smsdoi     | std  | sdoi | fdoi | sfdoi | sm                | smsdoi | std    | sdoi | fdoi | sfdoi | sm    | smsdoi |
| 26    | 38.7 | 28343.8             | 16.5 | 583.9 | 22.8  | 789.5 | 30.6       | 5000 | 136  | 297  | 64    | 3563              | 501    | 99760  | 2637 | 3487 | 952   | 15154 | 1904   |
| 27    | 39.3 | 4054.3              | 19.9 | 188   | 55.6  | 190.7 | 26.2       | 2409 | 203  | 260  | 122   | 1546              | 397    | 38235  | 2507 | 3944 | 1509  | 6861  | 1575   |
| 28    | 40.5 | 362.9               | 29.3 | 149.1 | 43.8  | 85.5  | 23.9       | 838  | 203  | 220  | 91    | 861               | 352    | 14369  | 3180 | 3095 | 1404  | 5178  | 1621   |
| 29    | 38.4 | 17804.2             | 17   | 300.2 | 15.6  | 152.3 | 18.7       | 4371 | 149  | 336  | 49    | 1386              | 303    | 79873  | 2524 | 3707 | 869   | 7388  | 1628   |
| 30    | 43.7 | 405.3               | 23.9 | 588.2 | 103.4 | 260.2 | 45.1       | 845  | 159  | 366  | 150   | 1445              | 471    | 14951  | 2499 | 6442 | 2094  | 8518  | 2029   |
| 31    | 38.7 | 2000.9              | 13.4 | 98.5  | 19.9  | 132.2 | 31.3       | 1597 | 144  | 155  | 45    | 1306              | 422    | 31131  | 2025 | 2590 | 883   | 6647  | 1788   |
| 32    | 40.7 | 832.7               | 16.2 | 144.6 | 55.8  | 95.2  | 22.8       | 1411 | 139  | 244  | 112   | 976               | 310    | 22717  | 2175 | 3317 | 1432  | 5262  | 1445   |
| 33    | 39.8 | 14031.5             | 38.6 | 394.8 | 14.3  | 178.5 | 28.4       | 3806 | 217  | 264  | 39    | 1317              | 463    | 74220  | 3951 | 3779 | 817   | 6816  | 1893   |
| 34    | 39.1 | 11372.8             | 33.6 | 474.4 | 14.2  | 627.3 | 31.7       | 3393 | 204  | 519  | 48    | 3509              | 501    | 59829  | 3947 | 4215 | 864   | 14208 | 2007   |
| 35    | 39.2 | 26085.3             | 40.4 | 940   | 15.8  | 804.7 | 41.4       | 5000 | 247  | 372  | 48    | 3738              | 656    | 96355  | 4630 | 4611 | 898   | 14602 | 2323   |
| 36    | 38.8 | 1682.9              | 18.3 | 120.4 | 35    | 145.8 | 40.9       | 1972 | 152  | 192  | 74    | 1433              | 498    | 27317  | 2427 | 3157 | 1279  | 5749  | 1802   |
| 37    | 40   | 344.5               | 14.2 | 141.9 | 41.4  | 46.9  | 16.6       | 832  | 99   | 163  | 73    | 540               | 213    | 15435  | 2004 | 2995 | 1305  | 3780  | 1268   |
| 38    | 38.8 | 4860.7              | 29.3 | 822.3 | 27.3  | 360.9 | 53.2       | 2423 | 191  | 470  | 77    | 2079              | 650    | 44121  | 3700 | 4994 | 1065  | 9297  | 2367   |
| 39    | 39.9 | 676                 | 32.1 | 421.1 | 97.3  | 490.8 | 54.8       | 957  | 186  | 290  | 152   | 2265              | 619    | 17949  | 3136 | 4635 | 2180  | 10231 | 2337   |
| 40    | 39.8 | 2903.5              | 23.3 | 537.9 | 36.1  | 206.9 | 41.5       | 2136 | 204  | 456  | 88    | 1473              | 545    | 33054  | 3025 | 5018 | 1224  | 7263  | 2042   |
| 41    | 38.9 | 573                 | 19.4 | 259.5 | 45.9  | 344.6 | 21.5       | 980  | 128  | 283  | 95    | 1730              | 314    | 17951  | 2445 | 4442 | 1369  | 8252  | 1537   |
| 42    | 40.6 | 5820                | 17.5 | 269.4 | 29.8  | 230   | 30.1       | 2609 | 141  | 184  | 67    | 1424              | 433    | 50747  | 2570 | 2837 | 1022  | 6814  | 1762   |
| 43    | 40.7 | 593.5               | 31.8 | 317.9 | 90.9  | 126.7 | 40.2       | 975  | 173  | 215  | 130   | 1027              | 439    | 18222  | 3344 | 3521 | 1834  | 5337  | 2124   |
| 44    | 40.2 | 16057.4             | 45   | 303.1 | 17.1  | 768   | 28         | 3988 | 247  | 283  | 45    | 2721              | 437    | 78181  | 5034 | 4245 | 854   | 12245 | 1938   |
| 45    | 40.4 | 270.6               | 13.6 | 82.5  | 42.8  | 96.3  | 22.3       | 751  | 114  | 159  | 91    | 955               | 295    | 13897  | 1961 | 2565 | 1383  | 5134  | 1477   |
| 46    | 38.6 | 28802.3             | 11.3 | 345.7 | 11.9  | 306.6 | 19.6       | 5000 | 103  | 150  | 40    | 2241              | 319    | 100107 | 1955 | 2728 | 654   | 10592 | 1464   |
| 47    | 40.4 | 757.7               | 24   | 149.2 | 48    | 122.7 | 30.9       | 869  | 172  | 196  | 94    | 1328              | 418    | 17121  | 3063 | 3217 | 1574  | 5473  | 1737   |
| 48    | 39.4 | 2438.4              | 29.4 | 525.4 | 26.3  | 126.6 | 28.6       | 1647 | 218  | 388  | 86    | 1151              | 440    | 32187  | 3570 | 4296 | 1139  | 6103  | 1610   |
| 49    | 40.4 | 573.6               | 31.7 | 672.4 | 86.9  | 99    | 40.5       | 1088 | 212  | 535  | 175   | 978               | 487    | 19019  | 3752 | 5853 | 2139  | 5030  | 2096   |
| 50    | 39.1 | 2045.2              | 14.6 | 356   | 31.2  | 197.7 | 23.6       | 1583 | 125  | 189  | 84    | 1382              | 355    | 29938  | 2119 | 3274 | 1233  | 7330  | 1850   |

Table 23: CpMP results structured problem instances 26-50.

| Inst. | lb   | Total Runtime (sec) |       |       |       |       | Iterations |     |      |      |       | Number of Columns |        |      |      |      |       |      |        |
|-------|------|---------------------|-------|-------|-------|-------|------------|-----|------|------|-------|-------------------|--------|------|------|------|-------|------|--------|
|       |      | std                 | sdoi  | fdoi  | sfdoi | sm    | smsdoi     | std | sdoi | fdoi | sfdoi | sm                | smsdoi | std  | sdoi | fdoi | sfdoi | sm   | smsdoi |
| 1     | 21.0 | 51.9                | 79.8  | 42.2  | 65.4  | 9.8   | 40.9       | 316 | 299  | 79   | 75    | 217               | 241    | 6227 | 5816 | 1573 | 1486  | 2560 | 2355   |
| 2     | 24.1 | 88.3                | 104.4 | 650.2 | 168.4 | 36.8  | 67.5       | 394 | 311  | 191  | 136   | 366               | 400    | 7998 | 6274 | 3970 | 2872  | 3489 | 3107   |
| 3     | 24.8 | 76.1                | 108.2 | 114.3 | 126.2 | 173.4 | 134.8      | 365 | 316  | 131  | 110   | 990               | 703    | 7304 | 6360 | 2651 | 2230  | 6171 | 4694   |
| 4     | 21.0 | 51.6                | 78.4  | 36.9  | 64.3  | 17.1  | 55.8       | 311 | 285  | 69   | 72    | 314               | 345    | 6326 | 5849 | 1522 | 1514  | 3152 | 2542   |
| 5     | 21.6 | 53.3                | 81.9  | 37.7  | 62.0  | 11.6  | 70.8       | 313 | 290  | 67   | 70    | 276               | 434    | 6413 | 5925 | 1490 | 1491  | 2616 | 3051   |
| 6     | 21.9 | 50.7                | 79.2  | 38.5  | 64.8  | 9.7   | 46.1       | 299 | 284  | 67   | 68    | 247               | 312    | 6135 | 5833 | 1474 | 1458  | 2422 | 2371   |
| 7     | 21.1 | 47.4                | 75.6  | 42.3  | 67.2  | 47.2  | 63.9       | 305 | 289  | 83   | 84    | 644               | 418    | 5896 | 5672 | 1550 | 1540  | 3772 | 2896   |
| 8     | 21.1 | 50.4                | 83.5  | 44.7  | 73.3  | 18.3  | 79.4       | 311 | 313  | 91   | 96    | 462               | 530    | 6120 | 5996 | 1520 | 1505  | 2969 | 3141   |
| 9     | 21.4 | 49.9                | 76.0  | 37.9  | 61.7  | 68.0  | 119.7      | 305 | 289  | 75   | 74    | 782               | 763    | 6117 | 5731 | 1512 | 1472  | 4370 | 4383   |
| 10    | 23.6 | 82.3                | 117.6 | 102.1 | 107.8 | 21.4  | 47.9       | 369 | 318  | 113  | 98    | 360               | 303    | 7537 | 6448 | 2350 | 1998  | 3187 | 2637   |
| 11    | 21.1 | 51.4                | 76.4  | 40.8  | 64.4  | 34.3  | 93.9       | 309 | 289  | 70   | 70    | 540               | 629    | 6205 | 5837 | 1533 | 1509  | 3553 | 3834   |
| 12    | 21.6 | 45.6                | 74.5  | 36.1  | 61.9  | 38.3  | 70.7       | 288 | 283  | 64   | 64    | 584               | 482    | 5880 | 5741 | 1410 | 1400  | 3679 | 3008   |
| 13    | 21.3 | 45.4                | 70.4  | 32.2  | 57.7  | 9.9   | 32.6       | 289 | 273  | 59   | 65    | 219               | 193    | 5849 | 5596 | 1306 | 1330  | 2378 | 2195   |
| 14    | 21.9 | 52.4                | 77.3  | 37.1  | 66.8  | 13.5  | 34.8       | 320 | 287  | 77   | 83    | 346               | 214    | 6238 | 5724 | 1452 | 1468  | 2714 | 2276   |
| 15    | 22.0 | 52.1                | 80.7  | 38.2  | 61.5  | 40.5  | 61.6       | 315 | 313  | 74   | 72    | 641               | 410    | 6290 | 6039 | 1447 | 1408  | 3648 | 2860   |
| 16    | 21.5 | 50.5                | 81.0  | 35.6  | 61.1  | 24.6  | 67.1       | 311 | 295  | 71   | 63    | 510               | 475    | 6211 | 5984 | 1395 | 1369  | 3196 | 3007   |
| 17    | 21.2 | 50.3                | 78.9  | 42.8  | 66.8  | 56.5  | 41.0       | 315 | 289  | 74   | 75    | 657               | 254    | 6268 | 5835 | 1544 | 1485  | 4061 | 2504   |
| 18    | 20.9 | 50.1                | 79.3  | 41.0  | 66.6  | 12.4  | 36.9       | 302 | 285  | 73   | 68    | 279               | 224    | 6189 | 5820 | 1581 | 1507  | 2860 | 2378   |
| 19    | 26.1 | 71.7                | 110.3 | 76.9  | 105.8 | 48.5  | 58.8       | 354 | 307  | 105  | 95    | 462               | 353    | 7128 | 6226 | 2129 | 1909  | 3748 | 2848   |
| 20    | 20.8 | 52.5                | 78.0  | 48.3  | 75.8  | 10.2  | 35.8       | 308 | 284  | 74   | 71    | 224               | 217    | 6304 | 5702 | 1615 | 1544  | 2702 | 2316   |
| 21    | 22.3 | 49.0                | 74.1  | 35.3  | 57.5  | 16.1  | 37.1       | 307 | 287  | 71   | 75    | 404               | 216    | 6076 | 5744 | 1464 | 1416  | 2976 | 2403   |
| 22    | 21.5 | 49.4                | 74.8  | 40.1  | 64.9  | 10.4  | 38.3       | 304 | 288  | 72   | 71    | 241               | 234    | 6207 | 5799 | 1486 | 1477  | 2654 | 2702   |
| 23    | 21.1 | 50.2                | 77.5  | 37.8  | 64.6  | 12.0  | 43.7       | 311 | 295  | 71   | 77    | 306               | 312    | 6189 | 5778 | 1420 | 1443  | 2578 | 2508   |
| 24    | 20.2 | 52.7                | 76.0  | 39.0  | 64.6  | 99.3  | 119.4      | 311 | 288  | 73   | 75    | 874               | 864    | 6145 | 5767 | 1480 | 1417  | 5286 | 4627   |
| 25    | 22.2 | 50.6                | 73.9  | 35.3  | 55.6  | 12.4  | 38.0       | 312 | 285  | 76   | 72    | 277               | 253    | 6085 | 5765 | 1453 | 1427  | 2786 | 2154   |

Table 24: CpMP results unstructured problem instances 1-25.

| Inst. | lb   | Total Runtime (sec) |       |      |       |      | Iterations |     |      |      |       | Number of Columns |        |      |      |      |       |      |        |
|-------|------|---------------------|-------|------|-------|------|------------|-----|------|------|-------|-------------------|--------|------|------|------|-------|------|--------|
|       |      | std                 | sdoi  | fdoi | sfdoi | sm   | smsdoi     | std | sdoi | fdoi | sfdoi | sm                | smsdoi | std  | sdoi | fdoi | sfdoi | sm   | smsdoi |
| 26    | 21.0 | 49.2                | 75.8  | 36.6 | 62.7  | 50.9 | 69.7       | 301 | 282  | 65   | 69    | 637               | 469    | 6060 | 5804 | 1479 | 1498  | 4058 | 3207   |
| 27    | 21.4 | 50.2                | 75.5  | 44.3 | 72.8  | 8.8  | 34.0       | 299 | 278  | 76   | 72    | 203               | 202    | 6047 | 5643 | 1590 | 1552  | 2381 | 2267   |
| 28    | 20.8 | 51.6                | 78.6  | 44.6 | 65.3  | 14.0 | 61.2       | 318 | 299  | 81   | 82    | 331               | 425    | 6214 | 5867 | 1510 | 1481  | 2898 | 2871   |
| 29    | 21.3 | 45.9                | 75.0  | 41.7 | 63.9  | 13.6 | 64.5       | 294 | 281  | 79   | 73    | 342               | 467    | 5889 | 5752 | 1539 | 1472  | 2709 | 2945   |
| 30    | 21.0 | 47.8                | 74.7  | 35.5 | 63.0  | 24.2 | 79.8       | 300 | 287  | 67   | 63    | 506               | 552    | 6076 | 5711 | 1402 | 1369  | 3214 | 3461   |
| 31    | 25.8 | 70.9                | 116.6 | 87.8 | 116.0 | 31.5 | 60.1       | 355 | 318  | 100  | 84    | 414               | 368    | 7123 | 6410 | 2024 | 1787  | 3557 | 2928   |
| 32    | 21.6 | 45.9                | 76.8  | 36.6 | 60.3  | 15.4 | 71.8       | 293 | 287  | 70   | 63    | 397               | 478    | 5935 | 5803 | 1452 | 1405  | 2818 | 2993   |
| 33    | 20.6 | 49.8                | 76.3  | 36.3 | 60.2  | 16.8 | 41.2       | 300 | 276  | 67   | 64    | 438               | 290    | 6154 | 5694 | 1484 | 1444  | 2912 | 2278   |
| 34    | 21.4 | 50.0                | 74.7  | 40.1 | 60.6  | 11.0 | 42.3       | 309 | 282  | 75   | 77    | 242               | 262    | 6112 | 5715 | 1517 | 1480  | 2599 | 2554   |
| 35    | 21.8 | 48.8                | 72.1  | 43.6 | 63.4  | 18.4 | 47.5       | 293 | 281  | 73   | 67    | 418               | 333    | 6042 | 5777 | 1597 | 1526  | 3079 | 2614   |
| 36    | 22.6 | 50.0                | 73.6  | 35.7 | 56.6  | 12.4 | 70.9       | 309 | 297  | 74   | 80    | 267               | 481    | 6101 | 5951 | 1446 | 1416  | 2700 | 3149   |
| 37    | 20.8 | 47.3                | 71.2  | 36.6 | 55.0  | 14.4 | 42.6       | 296 | 282  | 68   | 67    | 356               | 269    | 6052 | 5754 | 1475 | 1442  | 2799 | 2683   |
| 38    | 21.7 | 55.7                | 76.2  | 60.8 | 87.4  | 9.8  | 35.7       | 339 | 303  | 104  | 105   | 244               | 208    | 6482 | 6014 | 1762 | 1709  | 2306 | 2412   |
| 39    | 21.7 | 51.9                | 74.4  | 42.1 | 63.5  | 63.9 | 96.9       | 315 | 298  | 79   | 74    | 753               | 623    | 6337 | 5925 | 1602 | 1518  | 4448 | 4286   |
| 40    | 22.1 | 52.7                | 72.0  | 33.5 | 51.8  | 60.5 | 82.7       | 304 | 279  | 65   | 60    | 696               | 583    | 6179 | 5672 | 1407 | 1346  | 4183 | 3467   |
| 41    | 21.2 | 45.3                | 74.1  | 32.2 | 54.2  | 10.0 | 37.7       | 293 | 291  | 70   | 65    | 222               | 223    | 5885 | 5821 | 1405 | 1420  | 2444 | 2389   |
| 42    | 21.6 | 46.1                | 71.6  | 33.1 | 54.6  | 21.6 | 49.2       | 291 | 281  | 66   | 62    | 453               | 325    | 5938 | 5727 | 1428 | 1368  | 3139 | 2572   |
| 43    | 21.9 | 52.1                | 72.5  | 39.5 | 59.5  | 10.7 | 38.9       | 306 | 286  | 70   | 68    | 244               | 238    | 6185 | 5880 | 1510 | 1512  | 2679 | 2493   |
| 44    | 22.0 | 48.3                | 73.3  | 32.3 | 53.8  | 11.1 | 55.5       | 294 | 293  | 63   | 63    | 280               | 402    | 5969 | 5876 | 1415 | 1391  | 2575 | 2508   |
| 45    | 21.4 | 53.7                | 77.4  | 39.2 | 60.5  | 16.3 | 51.2       | 310 | 295  | 68   | 65    | 353               | 349    | 6250 | 5918 | 1480 | 1411  | 3052 | 2657   |
| 46    | 21.2 | 49.5                | 72.6  | 31.2 | 51.7  | 14.5 | 54.0       | 300 | 283  | 64   | 61    | 388               | 363    | 6081 | 5758 | 1374 | 1345  | 2820 | 2857   |
| 47    | 20.9 | 48.4                | 71.6  | 40.0 | 58.6  | 15.9 | 56.4       | 297 | 284  | 79   | 67    | 374               | 387    | 6079 | 5732 | 1559 | 1495  | 3023 | 2808   |
| 48    | 21.8 | 53.3                | 75.0  | 35.5 | 52.2  | 27.6 | 47.1       | 324 | 305  | 74   | 69    | 508               | 288    | 6329 | 5848 | 1418 | 1384  | 3356 | 2730   |
| 49    | 21.9 | 45.8                | 74.3  | 41.2 | 53.9  | 10.1 | 32.9       | 288 | 291  | 95   | 72    | 207               | 197    | 5837 | 5743 | 1549 | 1520  | 2546 | 2396   |
| 50    | 21.4 | 48.8                | 70.5  | 36.1 | 57.1  | 32.0 | 58.7       | 307 | 278  | 74   | 73    | 557               | 409    | 6038 | 5532 | 1383 | 1382  | 3408 | 2832   |

Table 25: CpMP results unstructured problem instances 26-50.

## References

- Baldacci R, Christofides N, Mingozzi A (2008) An exact algorithm for the vehicle routing problem based on the set partitioning formulation with additional cuts. *Mathematical Programming* 115(2):351–385.
- Baldacci R, Mingozzi A, Roberti R (2011) New route relaxation and pricing strategies for the vehicle routing problem. *Operations research* 59(5):1269–1283.
- Contardo C, Martinelli R (2014) A new exact algorithm for the multi-depot vehicle routing problem under capacity and route length constraints. *Discrete Optimization* 12:129–146.
- Contardo C, Martinelli R, Vidal T (2020) Efficient metaheuristic pricing for vehicle routing In progress.
- Costa L, Contardo C, Desaulniers G (2019) Exact branch-price-and-cut algorithms for vehicle routing. *Transportation Science* Forthcoming.
- Fukasawa R, Longo H, Lysgaard J, de Aragão MP, Reis M, Uchoa E, Werneck RF (2006) Robust branch-and-cut-and-price for the capacitated vehicle routing problem. *Mathematical programming* 106(3):491–511.
- Holmberg K, Rönnqvist M, Yuan D (1999) An exact algorithm for the capacitated facility location problems with single sourcing. *European Journal of Operational Research* 113(3):544–559.
- Martinelli R, Pecin D, Poggi M (2014) Efficient elementary and restricted non-elementary route pricing. *European Journal of Operational Research* 239(1):102–111.
- Righini G, Salani M (2006) Symmetry helps: Bounded bi-directional dynamic programming for the elementary shortest path problem with resource constraints. *Discrete Optimization* 3(3):255–273.
- Uchoa E, Pecin D, Pessoa A, Poggi M, Vidal T, Subramanian A (2017) New benchmark instances for the Capacitated Vehicle Routing Problem. *European Journal of Operational Research* 257(3):845–858, URL <http://dx.doi.org/10.1016/j.ejor.2016.08.01>.
- Yang Z, Chu F, Chen H (2012) A cut-and-solve based algorithm for the single-source capacitated facility location problem. *European Journal of Operational Research* 221(3):521–532.
